# Supplementary material for: CarSite: identifying carbonylated sites of human proteins based on a one-sided selection resampling method
Source: Royal Society of Chemistry journal article supplement (doi:10.1039/c7mb00363c), 2017-08-31
Supplement: c7mb00363c1.pdf [file c7mb00363c1.pdf]

### **K-type of carbonylation peptide fragments**

#### **K-type of 300 positive peptide samples**

SAPAKGRKKSKMGFQ

ENSLAEDKDGRRKGGK

VTTGIRDKKGVTVKT

QCRLKLLKLERIKDY

NIGYGSNKKTKHMLP

VTGGAASKLSKIRVV

QTTWRKYKLTDLKR

RKLLMLKKEKLEKVQ

QKKWKIMKKAALLIQ

GIGRLILKEEMKARS

DKLTTADKLLGELQE

KLQVLPQKASERLQF

GITNLGYKVLIQPSN

LAEKVFAKVLREEDS

SERSGTPKRRKAPPP

AAKEMEEKISNLKEH

ADAGRDKKEKVFEKH

SSAINILKEKKKREK

GPRLGDAKLKEKFKD

VSGEHKQKGKVKRKL

QQEVVRMKLRLQHSI

DLQEQMNKNKMMPVL

GQQDTIKKALNYSTA

SKVTYLGKELLRYVS

DEKMKAMKRSRTWGQ

KRQLQTPKEKAQALE

KEPVGEGKGTAFKQ

EADRTSSKKTQEI

QRVLDILKSSHAVE

HKKPIDLKAIGKLPI

VKQTVQSKILTTGEN

KRLGRRFKKLDLDS

IPVQLVFNKIKLYW

SQEIKDTKECVQNKE

TRFLEEIKNQDKLNK

CNHIREVKSLEELS

DCSQDLLKKREHHIE

KTLFSCWKSENEKLL

SPPAAACEKGKEQHSQ

AKEHKEPKQKDGAKK

YRIELLRKVREQVLK

RKFVEHVKSQGHKDK

KTLNDSLKKVENKVS  
RQICVTQKLLPAKRS  
TEKEMIQKLDKLELQ  
KQIEKELKQMELIKD  
YDASVRNKQQELHLE  
KHLKTLKTVFSETW  
RSIIGFVKLRSNKVK  
NKVKRSQKLVYMGKL  
YTKKDTKKNNAKSSD  
CNKLLAAKNINLRLF  
SGYEEALKIFQKIKD  
PIKQVEEKPQRAQNI  
EPTERPLKGIQSRLR  
EPAPKKQKLSASVKK  
DKLRISTKKLEEYET  
LQIIPGAKHGNIQVG  
RKLVERRKQVKQLMK  
FKLGNKVKSEVNKLY  
IEEKDLEKLDLVIKY  
ECREEILKFLCIFLE  
GLFAGPCKVINAKDV  
MASLRRPKRIIRGH  
KVPADLLKRAFVRMS  
GNGGVVFKVSHKPSG  
IPEQILGKVSIAVIK  
DSRSLAQKIVATYRL  
NIPPLTMKRIRERFI  
ISGLGGEKDRWTEAA  
RNIYQGVKKKQYDIL  
LKLESKLIKADKLYLQ  
EVQEVKDKAQKIVDE  
KVLMPKLIKAKPIRTA  
LLNRLNRKMEIKPLQ  
HFRSLRTKLLLMSRN  
VIQEIVDKSGVVRVR  
GRNQEKLKKFMIRIG  
KKRIKKRKGEAMALN  
TKEKAGPKGSKVSEE  
ERIFTGNKFTKDTTK  
KILKKINKAIVSKKN  
VANAVFVKNASEIEV  
CIVILTGKDPLGETF  
TEKLAGVKQEVIKES  
EREAELKKLQEARER

KKYLEDVKLQARGQL  
AECVKQAKGVRQQAV  
SISQKKVKIELDKSA  
PLAGKKAKKPAKAAA  
AAKARVTKPKTAKPK  
FQQATKIKKLRAGKL  
SVRGPRIKHVCRAA  
RFQLPLDKGNGKCHK  
MASQRQAKIQRKQK  
VFDKVSEKLGDKRLF  
QGKENLWKENLRKEE  
SGKLYKTKSNKELHG  
DRKTIPIKYPLKEIV  
ASFQAERKFNAAAAR  
GSLGSMKLRKSESK  
ESPHFYRKGTTPPRS  
KKKYEKEKEKNKILR  
IQYVVRLKKENVRLA  
TANIQDLKEEYSRKK  
ERLKRQLKSADLYKD  
DILQALQKLSKDNL  
KHLQQKLKEKDRELE  
GEDDERSKRIWLDYP  
PDLRVVQKYPLLKEP  
TNDFTKIKGWRGKFH  
TLAPVVAKLGNSGAS  
AKEADQLKQDLQEAR  
AKKPAALKPKVPKKE  
PGTTKTTKSSAVPPG  
IDIYLLEKSRVIFQQ  
INRALDAKLSRQFFI  
NKLMTNLKSTAPHFV  
HKLEGNLKLNRSEME  
LEVKSDSKEDENLVI  
KLSLEESKKGKGYDLR  
KETYEKQKGHYLAGK  
SQQMQSGKEYRKDYE  
LLSVKQEKEIQMKMI  
IISFAVQKETQFHTE  
GEKYLQSKEDLRLML  
LMLIELKKKQEAGFA  
VTGREGAKDIDISSP  
IPKMKMPKFSMPSLK  
KLKGPKLKMPMHFK

EMHFKTPKISMPDVN  
NLKGPKMKGDVDVSL  
EKAKSPVKEEVKSPE  
APKKEAPKPKVEEKK  
KARLERFKLRRMKAN  
LQSQEETKERRHSHT  
ADAKKKKKKSWVYEL  
ISLKKAKKPPLPPSR  
IEIKSKNKVRPGSLF  
LAAMDATKLEYERAS  
KEEKKKKKIKTIKSE  
GLGVMPPKAGQTITV  
GLEAAQIKELEELRQ  
ELKAWQEKFFQKEQA  
RKVEEVTKVCEGRRK  
TLVPAGIKSLGLAVS  
REVSQSRKPSASERL  
RGGGSPEKPPSRRRP  
KKFLPVLKEILDRDP  
IHVIQQGKTGNTEKF  
KIIKSSSKVHSFGKR  
ERMKRHQKALVRERK  
EMKKQTLKSLIIKLS  
PPPIKSFKEMKFPA  
QKATTGLKPVDSGCV  
IHKDLIKKPTISTAV  
CRGIIGGKSQRVNGL  
QLDRLLPKLARGSL  
SIVRIIGKMLPLEPC  
KEKELENKLEELKKQ  
KDLQEQNKKNEERMF  
EGKDEDAKSLRTME  
EMSAKRAKDV LHSS  
LLLRMLEKRQMDRAE  
LESMPIKMNFPQK  
SIEKTSKDLAPTSK  
VLAKTPKAETTTKG  
MPRVRKPKTTPTPRK  
KEERVSLKVLAKNFG  
KNPKEEKKPKEKKKK  
SRTVRLLKELRRALG  
ARVTEVMKALKCNVR  
LLLAPSSKKGKARLS  
DMLRLANKDSIGFFI

GDRIQVRKVPPLKIP  
TLADIKAKAQLVKAQ  
KSIRAFKAGFLAEEK  
QMYEEQIKNLEKENY  
AVLLKTKKKGQKKSG  
HGVCSVLKGSEFMFE  
AMPGA EYKAKKAKGD  
RLLDEATKRSNRDSL  
TEHPYKSKKAVWHKL  
LLSVRMGKEEEKLMI  
MVTSLFCKLGVLRH  
HFLPLMEKLKKAAT  
EDGEKEEKAKEDKGG  
VIPVLQTKTRTNVPT  
PEPKKIKKAASPSQ  
TQNSYRAKEPILALR  
DCENLLKLLVLNPI  
LLLAYKIKYPENFFL  
ERKSPEDKKS MILSV  
MYLMLDNKRKEVVHK  
WSQRGKGKVF PKLRK  
RGKAAILKAQVAARG  
AYPRLVVKLMPNGLR  
VPAAYVKKLDPAQSA  
KKFDDFQKDLKANES  
MAASRRAKLNESHRL  
VEHWKELQLAAARG  
TELIRQEKLEQLAAR  
LKQSGQKKS YTLRVR  
KYDAIKFKINQLSEL  
DELKSSVTKDKKII  
GRIRLPRKATKTKKN  
RRKKRAPKADISKSL  
ALMEVMMKEMKGSIR  
SKKIPEEKVPVPVQK  
EKPKAPPKGPEISEK  
PIKGVPKKTPSPIEA  
VVPRSEGKVHTLTLR  
PKIKVDVKFKDTVIL  
LKVTEITKDSVSITW  
LDGGSKIKNYIVEKR  
ESSVLRAKEVTWYKD  
VQEEISQKALRSEEI  
IGAARTTKKRIPNTK

GRNVKSRKLKEIFNK  
PRPPSLKKKQTTKKP  
GAVKGLCKLFLCTLH  
LSSLGGFKLAHGLLE  
HGLLEELKTVLSSHK  
RLIGNESKGEHVPGF  
KAADALGKLISIIHK  
IGSINLKKNEPPLTC  
FEALKYPKFSKAIVI  
LTKQDKLKSPFKFSD  
RKMEVGFKARGQPKS  
FAKNIPVKSKNIRVV  
SKKPDKEKPIKEKDK  
EKLKEILKERELKIY  
KKLALSAKKASTLWR  
VNEQEPCKFLLDVAF  
VFKTRILKIIDGLK  
LQLSKKLKTVLDQAR  
KKKLTSSKPPGELLV  
GLTVGFDDKDMMDIK  
QQLNGVQKQIIICGR  
DDVALVSKALQAEEM  
TGDFESKKNELPDGL  
AARRRFLKLQQDQQE  
SKAKPSYKQKRQRNR  
ETRESETKCLKELPGV  
ANRFLGDKSLTFNET  
LKLEDTPKINSRFFG  
FFGEGTKKMGLAFES  
EKLIKDLKSKEVPEA  
EKLTALTKKYRITEN  
KFLDMLIKKLKSFYD  
SYNETKIKFDKYKAE  
IDLLKIKKITAIIQ  
VSEHEATKCQSFRDH  
YLAPNNLKPVVAEFY  
YAVAVVKKDSGFQMN  
MNQLRGKKSCHTGLG  
LFSSPHGKDLLFKDS  
LSHHERLKCDEWSVN  
EGCAPGSKKDSSLCK  
VPQNTGGKNPDPWAK  
LCLDGTRKPVEEYAN  
AVVTRKDKEACVHKI

YLGEYVKA VGNLRK  
TVKVPMMKRLGMFNI  
RSVQLTEKRMDKVGK  
SNTKVDKKVEPKSCD  
LHTLFGDKLCTVATL  
NECFLQHKDDNP  
LFFAKRYKAAFTECC  
AEFAEVSKLVTDLTK  
LLVRYTKKVPQVSTP  
PVSDRVTKCCTESLV  
CFAEEGKKLVAASQA  
SEVAHRFKDLGEENF  
KAACLLPKLDEL RDE  
SSAKQRLK CASLQKF  
DSISSKLKECCEKPL  
VLLLRLAKTYETTLE  
CCKHPEAKRMPCAED  
SEKERQIKKQTALVE  
KHKPKATKEQLKAVM  
DNEETFLKKYLYEIA  
WLNKTFKCKVNSGA  
VATALAHKYHXXXXX  
VHLTDAEKAAVNLX  
GMYELLKVRPEQLV  
EVERTRNKFLFLKAD  
LTAFTNLKIKHPTYC  
DICTLPDKEKQIKKQ  
AADKTNKNCWGKIG  
KVADALAKAADHVED  
KAGQYTDKGLRKCCE  
MSAKEKGKFEDMAKA  
DDSPDLPKLPDPNT  
KGACLLPKIETMREK  
VGTRCCTKPESERMP  
EKTPVSEKVTKCCTE  
LVLLKHKPKATEEQ  
XXXXX MVKVG VNGFG  
TVDGPSGKLWRDGRG

**K-type of 1949 negative peptide samples**

SIAVQMMKRIHSLE  
SPHEQEIKFFAKILL  
FGEQLIQKSEPLDAV  
MASFSFLKDNSTDVC  
HSRALLVKTTLNISF

IKVLSSSKVLSEEIS  
ETWRLWQKFLDDYSR  
RINEYVGKAATRLSI  
EKQKSEAKDRKVLEI  
EYRLDWAKWKAKIQS  
PGEHVFVKGYEKGQP  
GILDRSSKSQSSASL  
ARLEADEKKQLCVLQ  
QNLQDAAKDMKKFEA  
FVILRDEKWGGNKTY  
RQHPDTLKYSTLMDS  
PTTLIPAKAPEIIDV  
QIQALEDKKEKEMSA  
THFVARLKSWRGNEP  
WYNLLSYKYLKKQSR  
AQPAAPAKVPSPGQQ  
SPQPESFKTSRSSKQ  
AARVTGMKKWPRTPK  
ECLVSAQKVLEGSEL  
VTSNEQVKGYGTHLM  
NRGWFCVKVILCPF  
RILAAGGKSNHLHLW  
NEMASTEKLTDVARY  
GSKDREPKPKRKRKREP  
QWQFLVQKSAEKSQK  
HAPQFPEKEFNITVQ  
KMALEVYKLSLEIEQ  
RNTRILRKCIEKVAK  
KAVMTSIKQLSSEEL  
IRMSARQKQIMEIEE  
HLSSPPTKFFVSTPS  
LENSSGTKSAFVTVR  
EELRDYVKARLKVFY  
IRVCALNKVGLGEAT  
VINYIVEKQDTRKDT  
KCSKTSFKVENLTEG  
FSQPIINKVKPQLLK  
YRVEAAWKLSQWDLV  
KARKLFYKAIVRGKE  
NAEMHKNKLQYFMEQ  
PRLPKLQEEQREL  
ALEVDFEKMKKERDQ  
YSAVNPEKDIHSGLI  
SSVNSLRKAAHEALQ

RNTILWVKENKVPCL  
HTLVESLKLSITDQQ  
ALDEFATKLIQNNHY  
EVL MVWYKQIEQVLI  
NWCSQMDKGMLHFGS  
EKAPATPKTEKKDS  
AIPLLAAKANTKNTS  
ESIHNPKSCPTPEV  
KEYYQRNKSNTIEP  
KREPKEPKEPRKAKE  
VSFIENSKFFEQYEV  
ALLADSEKPSHKSFA  
KLVVTGLKEGAFYKF  
FESHQNYKDVQDPSV  
PLQQFCSKKLFSIPE  
REPAGDGKSIRTFKE  
RYLYTLEKVCQPLYN  
NDVLEHVKHVFVINLI  
QALEDIIKKFASVPE  
KGPALSRKRKKEVDA  
VFLTLYEKVFEDTYT  
TKVPEVSKKIVPQKP  
TEFQNHEKQESQDLR  
QEWFLGAKAAAKESS  
YGALAPFKPSEPGAN  
TTILQHWKKCDSWWA  
CRGLLLPKVVEDRGV  
GDYVDRGKQSLETIC  
NVLQYCRKSGLQTDY  
PKPPSKVKSSSKESS  
GRPLVASKKYRISFK  
MQLPYRAKKFSLYCT  
DLSGADIKAICTEAG  
SKADAPVKWFKDGKE  
DGFVDQKKKLXXXXX  
DVQFYQLKLPMTVA  
LVNPAGEKAVFVNVR  
KEGLLQMKLPEPVKL  
RVNAWQAKANNKQW  
ITGQLGVKPQTGNSI  
GCFWVIKGCSPFLD  
AISDVETKETYSSG  
SKPPGNLKECSPWMS  
LRWTRV NKDYVVYDT

PVAAPEPKKETESEA  
LGTNGTVKYSISAGD  
EETARREKQQLLDVQ  
HQSADRAKSEMATMK  
EPPPSTVKTYHYLVD  
ENYRPLAKTRQQNIS  
LTMEINPKVPVNLRL  
DGPLSPGKMEDISPV  
EMDTDQLKLYEEPLS  
LYRSVYEKNMKIHI  
TEFLALMKKVSXSPL  
DNAPQFLKSKYFTPV  
KPEELVSKELSTWKE  
EKKNEVHKVEMFLGE  
RGPQVDVKGPFVEAE  
EMLTPEEKALLYEAI  
ITLGPPSKPKGPIRF  
IEKSKSLKQTDQPKA  
RNYLPALKVEYNTSA  
KRGAAVKTSGSPRS  
LCNQCRGKKAKNPKE  
EVCRAGSKHSRPIPL  
QKELVLSKPCKFEK  
SRTRDVVKSALGFIK  
STDWSGVKKPIYLSK  
TGASGSFKLNKKASS  
KKAKKPAKAAAASKK  
GSELELAKMTMLLLY  
YYSALSGKSIDGHS  
KGSLEEEKRRAADAL  
GSLEQIMKDRWMNVG  
GETTHTDKVPGGEDK  
PLLPSLLKCLKMDDT  
SLESISTKVIVTQTT  
TSKMDLEKPNYIVPD  
QAHPVMRKCLQSLCD  
FHLVRDVKQGNLPPG  
IMEAPLLKHKDDIED  
TGPPQVGKTGSYLQF  
EEDWEINKDSAVEMA  
RVLQALMKRFYLPGT  
LSFINGYKNIYAEKV  
PLQEAESKVSMALEE  
VNRETDTKRPDARLA

EHSEIHTKLYFLQWL  
ETADQFLKRSLEMRE  
RGHEELRKLESTLDG  
REHPFLVKGGEDLRQ  
TLENGNKQHQLGVW  
ERSAEESKPRSLQEL  
KYQALLSKMRAIDLQ  
NFSPNQTKFTVQRTD  
LVFCERGLQPPRKA  
AFSASARKVVNRDSC  
EKPPPVNKQENAGTL  
LLETGQEKMAGDQKI  
SLLIGVFKHGYERYN  
DITLTNDKPATAIGV  
EVSEIHIKVKPTTKS  
CFPEGLVKSCSETLL  
TAFVQEPKVGETAPG  
PFSSADV KPKVEDLD  
DLSLSGKTL CVTAG  
SIEEPEGKLGPKFK  
INQVNTIKNEAEVIN  
YQPLRRSKRRWVITT  
TAAVQLLKPEGVLVY  
NTSLLSQKKKLEADV  
ESTPLANKPGKQSGH  
SCQLSREKANVKWYR  
DIAEQLLKANPPGKD  
DLTTILTKLAKTDN  
RVMGFPEKSDIFDVD  
EDTATSSKRRPRTRA  
YSIQDWAKRMKALVE  
NSFISIPKMEVKSYP  
AGAQALEKLEAAESL  
MTTQLICKLLRSREA  
LRLLEPVKRAQEMDA  
XXXMAKRKEENFSSP  
IEIGLEGKGFEPTE  
RSVDSSAKREKPVVR  
MESICIMKGMKPERK  
EISESVGKNQFTSES  
APVPRGRKGKTKNQ  
QSPAVLDKADGQKPV  
KLNMMLSKGELLSTL  
YTTQSTIKPXXXXXX

HTQAGWRKEGNLGTH  
AGTERWMKVVTLKPT  
KEAYEHTKAYGYTLG  
WYRLRLLKPQNIIP  
EEFVTSYKALKSRIS  
WNLRLDVKKNPVQDK  
TSLAIAQKLMELKLG  
KVEDLPLKLTIIYSEA  
VTACNPYKPPGPPST  
RGQVDYSKIMNGNLS  
GVIYTVAKEELKKFE  
TWSKDGQKLPPGKDY  
LANSAARKKKLLEAQ  
HPVSGVRKEQGGGCH  
IFTDSEIKDEAFLEY  
GEVQLTAKDFKTHAN  
SPTSPFYKACDTVFK  
SHDNIRVKWFKNDQR  
HMYKMPEKILPKILG  
KEKQEANKQKVPNPS  
ISFDDSSKTQSHSDA  
GAGEEEAKGGKRPKE  
GEEVPAKKTIVS  
VFLDSGRKTRSARRR  
NMVLPDEKGAGALPF  
SSEKLFVKYDLILTS  
TNLTDDLKALYKVAG  
FNEGPCSKILIQCKA  
VVPGASIKYDAVKEE  
MLQVTQAKKSQAIAS  
KLLKELHKESKTRDD  
IEAHEQGKDIDLNKV  
EVREAAAKTFEQLHS  
PIPPDAKELELMFG  
TVWRQADKHNIPRIC  
PRIQQAKTSLQEEM  
QSLAPGKFSPAGVE  
IDFRLFAKLNAFCVI  
TSTSDILKVPKPEPI  
ELYSPVQKANPGTLA  
GATCNNNKLSLSNAI  
EELPEISKTKEAATT  
QDPACSDKAPGMEGT  
QTLAGTQKFSIRPSP

GKGSTFAKASFVASG  
IIPHISTKTIDSWMS  
ITSEERTKHDRQFDN  
CIDDALRKNDFKPLK  
NRFEDCQKEEETKQQ  
HESTSVAKDKSSTAS  
AAHTQSFKQPSCTHI  
IQNVHASKRILFSIV  
ETTTAAPKMTKETAT  
QHTLNYWKEQSLNVS  
YKADTVAKVQGVFEFS  
DFEEQFLKEKRFHDQ  
IVALIAQKGNFSKTS  
LKIEAENKYDAIKFK  
QNEYNAVKEREHFNQ  
IETRLAKNYIWALS  
GAWEQQIKQLEAELS  
WAEMCSIKAVTAIEK  
PVDNHRYKWNGRWWE  
ILLNLEKIPGKNAI  
FAQVFLSKFTMVKNK  
FLAGCQAKVEQAVET  
RIEALQKAAEKGTH  
LRDGQTYKFRVLAVN  
TLSWFPPKDDGGSKI  
DATRLTDKLELCNK  
ENQTEINKPKAKRCL  
NQTVTEFKQLISKAI  
PEAKTPAKEEARSPA  
SSSIFCLKMHKEMIF  
YRCWRAHKEYLAILK  
KKEEKEPKKEIKLP  
HTSVTLLKCTCTISM  
QLWHHWCKKDKELYH  
VSSPVIGKLNISETA  
DYHKTAKINIPADM  
GHTFLEKPPVPPKP  
QVTMPGIKVGGSQVN  
GVSVADQKGKSTVAS  
FLAQADCKLLECRNV  
ALHPNAFKRLGASLA  
SSCIDMGKELLARSH  
NASKEERKRWQATLD  
DSGTYTCKVSNVAGG

TQILEELKKTMDNL  
TVEARLIKVEKPLYG  
TSTTQHNKVSTSPKI  
MSLDFYTKVLKSCRS  
PSPVGALKGSDVILQ  
DAMTHLIKISRIIRT  
GENMTSGKLTVAGGA  
ENRFGVSKPLESAPI  
GTRPGDVKEEAPQEM  
ARPAFNLKKPSKYCN  
HIFFDAAKNLVWKER  
VRYENNLKPVLKHVK  
KYEGAKVKVLEERQR  
FISDGVRKSLKVPE  
GIPPPTLKWEKDGQP  
QELEQENKLFKDDME  
QDNLGLQQLDLQRE  
SEAGVEVKKEVGSI  
AAAEENSKMEQSNLE  
LAMAVIRKKHGMXXX  
ELLETLQKFKAVDKE  
WYQETHEKQQDLNIM  
RSVLESJKRYRFGKD  
LSSHSSKRWDWSKSD  
VQVITHVKEKLFHMD  
ECPDAKLGPKFKMP  
DVETQSGKTVIRLPS  
IDYNPFAKGFRDDGL  
LNETQLKQLVDAQK  
QLSDLNYKVEGEKLK  
WQEKFFQKEQALSTL  
VVSITCLKHKSGGHA  
SASLAHMKAKFRETL  
EEKQTSWKEIDNDFT  
TDEDTFKEFLKCLA  
SCTLLSEKDESSSP  
EKASQLEKTGNDASK  
FSFPASPKVFGGRLY  
CTKPITCKDELAPPT  
KVFERASKDTFQLEA  
MSPDQADKLPQLQGE  
EVLGDGVEKMKSMSQL  
LLEFHYYKCLVLGLV  
DLSAAPAKQFNLEII

GFVLRGAKAETPIEE  
ESFFSNCKSLPEAPL  
QSLDRETKERFVLM  
LRYRQAAKPPDLNPE  
HLNEVSLKLPLSDVA  
LRIVVPLKDTRVKEQ  
SAATQALKRNGAQIA  
DSASIMVKAINIAGE  
NTFSFAEKNFEVNYQ  
ASLENCMKLSQMAVQ  
IQLPVVSKQHCKIEI  
RQSWSVCKQVFPGLN  
MDWGAQQKANRSSE  
SGILDREKEERVSLK  
LSLQSEHKILHDQHC  
PYIAHSQKMQDLFSP  
LTSEETAKMMVKIEA  
RPEEEEPKVEPKKLE  
DMMATLAKSQVTTVK  
EGKEEWEKGDKEVR  
AAVSEDGKSDELLES  
QKELAEQKSVETAKR  
AYEDLSQKYKAAQEK  
NEEIDISKAAQTIE  
KGDKGRYKIVLQNKH  
PFLVMIKNLKKYFT  
SHVILGDKVTKNSSG  
TQEWDNSKSILGVQC  
TPHLRILKVGKDSG  
HLLQYFLKFPAGYE  
TSNGLVTKALEHAFQ  
RADQRKAKLGDSHDL  
RGGSGFLKSGGEMLK  
PDKEKPIKEKDKGQW  
LLFGQRAKTIKNTVC  
GEELVSLKEKSKSPK  
EDDCLAFKVHQYFNV  
FHLEFGEKSNAKIKD  
YFTTQSWKTAQQHLR  
EILQDLQKRLESSEA  
AETEIVCKVVESSI  
LDLKINLKASYIIVP  
VQAASSKERGGVSL  
RAEVHLRKSAFDMFN

FLCIFLEKMGQKIAP  
PKKTRNLKKITREQR  
IQIVYLHKFLMSLLN  
GLDTPCFKTSVNDSQ  
KREVELEKNTKEEED  
SDVWVWETKPKKKARW  
DLSSQLLKVLGTRKL  
GQSQDNEKELAALFQ  
LILKEEMKARSSSYA  
VANLEEGKSYFFRVF  
VFFQSCAKAVMWQKM  
LSSDDYTKKKKKGKK  
TARFLYGKKVEGTAF  
DGAKKARKPREASGT  
FTVQLSNKLIMDIRR  
EKEQLRSKLEEMYEE  
QDLCSIGKEHVFSLE  
VEEGLTYKFHAAWSS  
LSSHDSIKMEIVDHA  
GFIDDAVKKLNELSF  
SSQDVESKRSDKTDF  
QDLEDLIKAKEKEVE  
DPMAGLLKFADDLGM  
PPGQLQVKAQPQARM  
EYDVTMPKVESEIKV  
FTEPAIAKNPYDPPG  
GHRKRASKSPRKTAS  
ESTIGHLKDVVGRIA  
QAEFADLKKLQDLTL  
LPYQNMDKTKTDYTR  
QKEIQVKQQRLELA  
KNDFKPLKTLLQIDI  
EFDVNLSKANVDISA  
PYMVKMLXXXXXXXXX  
RLYRKANKSSKLVSA  
STGTLVSKREVELEK  
TRVVHAAKAALAAFN  
ADEMDRMKKEYTDCV  
YYWGMESKIPVEDNK  
DSFTSAPKQTPDSGK  
FHKSVEIKPSDKHRL  
ETQIIPGKGQEKPLQ  
RENFDKKEKGKTPKYN  
TQQCVQCKESVGSGL

KVASLLGKKGASATK  
IFENLANKADRQYE  
LQDQLLQKEQENAKL  
CSALLSVKEPATITE  
EGEEEGDKNGDGGCG  
GRSEERDKEELEDLK  
EEGLRSQKSDERQGV  
VKKLEASKIVKAGDS  
ERYLENYKCYRKMEE  
EEKAKEDKKGKQLRQ  
XXXMDDDKPFQPKNI  
SLPGSITKAGDFLEA  
ENLAGPGKPSKSTEP  
SSHRSNFKDPLQVAN  
HLCRIIEKKHVSLNK  
GDRVNYIKRSLQSLD  
DEVPPTIKLRLSVRG  
AALDNLRKVVPCYSK  
LSGVPLYKGDVPTQD  
IIPTFQDKSLSFPQH  
IGLHLVEKEIDIEKQ  
GTDYQLSKEYTLDVY  
KRRPQTPKEEAQALE  
NDSQEIFKLAKDVLI  
EEPWLEIKHLHESLL  
VNTATCDKNPSASKN  
TVVERLVKVTLYGSQ  
TQDTTPFKITTLKTT  
VVMAFSMKTMQNAKN  
VTKNVRHKLTSRNER  
AHTQGCKSLSEMY  
AFAICDQKSVHGTFS  
VSTSQAGKLPTRITV  
LKAMIMCKGCGAFCH  
ILSLNQRKEDLLVDL  
VVYVAPAKSLVGQVA  
VSISSAVKSAPEENS  
LPYFIRNKLCKVIVD  
DELALFDKSINEFWN  
YKDGKRLKNYNMPWG  
LDDISQIKAQVKELS  
IFDDWARKVQQRNLG  
KAARGEKDKETKNA  
AESD TDV KLSIFCEQ

DRTRVPNKFRYPFY  
GKYTCQIKNDAGMQE  
PVSASTPKIGAISL  
ERPDVDEKRSDLLKL  
QIPKRNGKENGTE  
QKPVLDLKLSGVLT  
FVCSFLQNRKHPSS  
VKSMKEPKTEAXXX  
MELLEAEKERNKLS  
LEADIRGKPIPDV  
YGEALGIKYPVQVP  
PTMSIDLKYLGVQL  
DFIQHIMKSSPLMF  
ARQSFFLKYLDHEI  
GPIIVEEKLEAPDI  
IVTRTTIKDQEDLKW  
THTELVIKEADRGDS  
QAAFRGMKTRRHLKS  
VTMQSVVKPFSIFGQ  
SESSAPAKTEGRSLE  
NSYAGQLKSARFEEA  
PKFGFGAKSPKADIK  
LDATPVTKGVASAVV  
EDSDSPTKSSSTEPS  
GYSISHVKRVLDAEP  
RSPGGPTKLIIEISD  
RQSNRATKEIQLHQM  
IALLAARKNKILEMK  
KSQEVEDKTKEYELL  
SSNQEEPKAQGKVEE  
YYRAYVSKKEFLSLK  
WQAFLDLKKRIDDFS  
ELWIRDTKYVQQPCV  
QEMEAFGKKAANRSW  
LVGIYGRKGLPPSHT  
ETSQRISKLQEDTSA  
LRKKMNLKPIMRMNG  
KGPELDVKGPKLDAD  
SKAMSVAKQVFNSLT  
KKLINFMKMLSQKLL  
KKLTRCLKPFENSRL  
PDRDERLKKEKQERE  
LTQLSLLKDTLSAYI  
TETTEPVKASEAPSP

VFETLIPKPMMQHYI  
SDEAEDMKEAMNRMI  
ISNVSAEKATLTWTP  
PGPLPPGKYMAGLNL  
PYLEFRYKRRVYAQN  
KLLESQIKQLEHGWE  
LEKEKAAKLEILQQQ  
EAQVRERKLQEEMAL  
ISQTPLLKESGFRVD  
ARPGLEPEEENEKSE  
KKEAPPAKVPEVQKG  
TRWVPVNKSAIPERR  
EKYLTILKAVKVLQA  
LNVIVLDKPGPPTGP  
GLWLPLTKNVVGIDL  
KEALKVQKNQKEILL  
ESDSVVAKNAFVTPG  
EASDVETKLREFEDL  
LEVVDVTKSTVTLAW  
STDIVPAKKWDNAAI  
QKTTLVVKDCIRTDG  
DASVPSMKVHAPGLN  
KMOVVAELKSELAQTK  
LLRDLEEKVDKTELL  
KVQINVVKLIAALKN  
EDITTIFKTLHGNIW  
VEANQAAKEDTVVLK  
AELCGVLKAVLQRKT  
QEQLNELKTEIEALK  
ASDVSTAKSPFSAVG  
GANTGIGKETAKELA  
LESMMYGKKVLSQEP  
HLEITIPKDLKLKEA  
RVGAGPMKRENGLHL  
VVFVKVSHKPSGLVMA  
IEDEQREKSVSHQTV  
EEFCVFKMMSLRRD  
NILEGLEKCLKHLDL  
YREDSNDKISEVSSD  
LTNADEAKAQELMK  
PSEPTITKEDKTRAM  
MSDQECVKRNREEEI  
ELEELRDKNESLTMR  
ELQLLNDKVETEQAE

HPGYALPKAQTTVTC  
NLGSGTYKLTTMKKV  
VKSPEAVKSPKR VKS  
KMKMEIKKSRRHPLG  
KAKLAVEKGRKARKL  
LHQSRLTKLQSVQAL  
FVVPDAPKAPEVTTV  
SQDSEWSKREIPLQ  
SSSFPLPKQYLDVSS  
CLLAILLKTTNRASD  
LFKKNLNFKRLGAGML  
FGPAGTGKTESVKAL  
ASTTLDIKDSISAVS  
REAERA AKASSSAHE  
VPLTQVAKEALREAA  
LKKMDSIKGSFIDLE  
ACPFLREKRGKNITT  
LEASKVAKQGESIQL  
WFLAAGRKWSCEAIE  
GKAMHTPKPAVGEEK  
QEMMSQIKYKKNAL  
ELCRRLYKLFQLLL  
KASMASLKKTISQIK  
AFDADMLKVFRNAEK  
AVESIREK LKAKPLL  
EIQQLLDKHKEYFQG  
ADLTNPTKVTHLYNH  
NQQQNHPKYSGQKNT  
VHGSGPSKDSFGELS  
MSVEEELKKDHAEMQ  
CIPNEYRKGSTVKSS  
LYGPIAFKDFILSKG  
ECSLSLNKKSRSSTP  
IEVVFVTKFLYSILA  
FDAAMNEKMDLLNDA  
YPNFEETKSLPWILL  
LTAQASLTKPIHTI  
CVDCYRMKRKNCQQG  
PIFVQWLKEKEEVIR  
IITEAFP KPDIPQA  
IINITMTKKLDVEEP  
KKFEALIKKDLQAKE  
CSIQQQRKIAQYLKG  
EWESEVKKLKKSKIK

WTLAAPFKEQHHRG  
AAASGGAKELKNIHV  
RMASLCLKPPKTRRV  
RCNKLLQKVQKNKEL  
DKMSFVEKVNKMTAK  
RYYHTLIKKDLNMVV  
RPRSELLKAPSIVAD  
ELVVSGNKRLKELSY  
EQDSLNAKLEGVSDF  
VTVENASKPDFTKNS  
EEPGTEGKQLGQAVN  
QTFYLLQKITKDNN  
IKDTEAQKVSTQKTS  
DLLAYIHKQTEEGGN  
VTRFEISKLTEHQEY  
NGHVNFEEKFLELAKQ  
LTEKRMDKVGKYPKE  
KTKNAVEKFTDAKRS  
RPDLIDMKS VKHRSN  
VRMLYYLKAELGEA  
VGTALPGKFKIVLDS  
PAGPPRKTSDAVVQ  
EWSRCTEKMIVRQY  
DAEANQLKEELEKVT  
EVYLVSGKNVGYAKY  
LVSDVDYKNYLHQWT  
KEKFEKTKGQPYAST  
LSSTAQLKVLEADPY  
KSQAIATKKIISDYH  
TMEQALNKS NKL NMD  
EIISDVLKIPVQLVF  
NHLETCLKTQQIKSH  
LIQELQHKLNQKKEE  
QKNKPISKKEMIQRS  
EPFSAMSKSTVSTSH  
SDMMENSKEEGTSSS  
VAHPLNEKMWSAVFG  
NMVEELEKALGMKLP  
LKQMELIKDQYQKKN  
DSDSEESKKPRYRHR  
YTCDCSQKEGVYRVA  
PISVVWLKDRGEVIR  
GLVYRGVKVMPFSTA  
SSYFHREKSNIFSPQ

IEQFSTVKGVELEPT  
QELIALAKNRFLSKD  
ELDLWHSKLNELDSE  
REQRRHMKRWEYFIA  
DTRTHFLKTKAAVIS  
PNSELCKPLCLMLA  
KPEKSLAKVEKELTP  
PKIMSPEKSHRVISP  
GKRHYEEKQKEHLDT  
VFCAETEKELSKQWK  
YELTEEEKFYRNALT  
RRQLLQKLLQRRRK  
DLLLETRKPDQVFQS  
ALHRLIAKSRELYEK  
WRSETTEKHGQADSE  
ELIAKMGKSEXXXXX  
EKEVRAQKLADDLST  
SPTEGKRKIIIXXXX  
EYNTVVQKPRQILCQ  
CQITGTPKIRVSWYL  
MRYSAEWKSTVSRLG  
PVAEVAPKAQEGEST  
ATLMTQCKEQAQKEG  
KKTNEILKGIKLLKL  
FCDQQLRKEEENASV  
AILTALLKGTNASAF  
ARIHIPFKGRPTPEI  
QTERGRNKDKAPEEL  
VCNPHSGKEYFRVPD  
EAMTITWKPLYDGG  
TSTGHKNKEFVARIK  
HSEAPFAKSDNQPST  
LNEDREVKNAEILRM  
LHAVWEHKLGSQVSL  
EVLHYSQKAQEKLLV  
PLNSAAHKESPPTVD  
LWLFEGEKIVLQVPA  
PYHSHCMKVTAQNSD  
VMDWINDKEAIVTSE  
AFSTLIDKGTHVAFL  
DSDINANKEELLRVL  
HSLNLLLKSIGATLT  
CDKRLWTKIDLSRCK  
LLISGGRKGFTYVFD

QPLHRDGKLSLDQAL  
DFDDLERYWKNLTF  
FGDTEEAKKQINDYV  
TKEVEMMKAAYRKEL  
VSSSMFKYDFNSSM  
CPPSIDLKEFMEVEE  
NFSSVLYKEDVSPGT  
APTIEWYKDDKELQT  
RNLPSDYKYAQDRAS  
PGQDNLVKQLRDAFD  
ELEGQIAKLEEQWLS  
TPDLLRAKRGQKLQS  
ITNYIVQKRDTTTTV  
STSDRAEKFCGQKKR  
NALDFVTKSYNETKI  
EHLEHEDKQNRRLAL  
QASLHVWKIVVSNTP  
QGEQLIEKSEPLDAA  
FVQAFVNKDPLASTK  
RSEVSQVKREKENIQ  
KPLAASPKPAGLKES  
RQRNRKNKMSLALKN  
STVEVERKQVHILQQ  
AVDPTLLKTFEALKF  
MEKEHLNKVQTANEV  
QHAELRDKTTMLGKA  
KGEVETLKAKIEGMT  
PASGADSKDWLAGPH  
DYIPYVFKLLKENLC  
ARQLLREKHKASIVI  
QALELPQKAEALKLF  
VLTEDALKSLENQTY  
HTILPGSKTREPSNA  
ESPSPAPKPRKVELS  
PDSTVEFKAILKGTP  
ENHTPEMKHFVGLEK  
NYFAIRNKKGTELLL  
SAVGEHEKVINNQKE  
EEEEYEPEKMEAEDYV  
LGREVGAKFWELLLV  
YKRAMEIKEAETSLL  
QPGPDYVKQRFQEGV  
EGLQPAAKAGTEDEL  
SLSQGRIKTFSQSEK

VPEPILRKIETFLNH  
YSDDEYIKKIQRLE  
RETQGIEKLVLINKS  
RPEGLREKNSVIRSL  
LFLPFSYKNKYGMVA  
ETTSASLKKRHADSL  
ELQQLDSKFLEQVHQ  
QVPTPVVKQTKLKQR  
CFESSETKKSVEQKL  
QLQLRHLKAIGKYEN  
FADIPTGKTSPYILR  
SRSFREEKDRSNKAE  
LQINELQKEIILRQ  
YSPSPPPKRRASPP  
KVVSVTRKPEEDGAR  
CLSAFLDKYELQIPS  
LLSIKWNKLEDVAQL  
VTDVIEMKDRLVSPD  
VQSLEGEKLSPKSDI  
DCIEAEEKVHVIEKK  
CVLRLGNKEKTSTAK  
LLSLLQAKVASLTLH  
KAALKTQKTSEKYE  
VREEILQKEITKLE  
RLFIISTKAGSLGIN  
ESGPEQSKQKKVAPR  
EGFFRSNKVFVESSE  
LCLAVPDKTVRWCAV  
VSELATVKRPQERSY  
GVKQEVIKESKVEEP  
NPNSSGRKKLTDSPG  
TPQILHAKKSYDLQS  
NVTFSFVKYRDTDTN  
GFVYIAGKCGLVPVL  
RASLKRLKPHVPLGR  
EKKLLMFKRVQEAED  
DSCVVAWKPPASDGG  
FCIQEIEKSGGSKEA  
FTSLEVRKVAETKEK  
FTGDEDIKIPENPLE  
EELAQFLKVEQKMNN  
KKEAGNKKSTPVSIL  
ITCPADPKKTLGIKL  
DVDDLIFKLAYYEIR

ATYLLDGKVVNVAGG  
IDHPVHLKFNVSLGK  
GSMNVSVKLKTCTLD  
KKLTKMDKVLGSSIH  
SWMPTLEKICEEVIV  
PEHLRTTKV NKQISD  
ENAAGVGKPSHPSEP  
MLEQTLQKVTELENR  
SLEMP L R K Q E E L E S T  
KAEHV K Q K G H Y V G V P  
XXXXXMPKSGFTKPI  
KLEYSSF K T N Q E K E F  
IELFSTEKKDKNDSE  
KMPQDARKILSNQEM  
LLDILAKNPSGLTQ  
ERQVSHAKEKLTALT  
RWRKLVSKTQLEMNL  
NYIDEREKSISELSD  
PIEECRYKLYQEMFA  
QDRIPSGKQHQETSA  
ASDRLTMKNDHISAH  
LQMISACKGETGAMV  
VPSDEKFKCLQDQNT  
EDDDGSLKNVHMAVI  
KELNLLQKLYGLYDT  
TVSIMLTKYAAAYNTF  
SKAGVPSKSSGSAAL  
STFDYSLKDRAPFTV  
LFQQGSKQKLHDCL  
DEEDEEAKAWLQ A H P  
EVINRIQKL R K K C N L  
IKVDVKFKDTVILKA  
LPLMESGKILPGVRI  
IRTALFEKVLDKIVH  
AGDGKSIKAFKESAK  
VKPQAKKKAGDQEEE  
IMIDRLEKASSNQLV  
ANDLAAQTKLWSES  
KAITCGEKEKQDLIK  
PISITWLKDDQILDE  
ATTTEEAKGRNPRAG  
QIIQIEDKTTIINNT  
ASQELDVKRREAIYN  
AVDELNQQKEGFRST

EYEEDRGKGFFPQTI  
SRSRRRKSRSPPR  
RLEERARKLQETNLR  
VMYNAESKGTSAQTW  
IFNQLEVKNPDSKMM  
ELLSLVYKGIAPGDE  
WDSPMRVKLSIWKPY  
GISDLLGKSGITEDA  
SEEADSLKHQLDVVI  
NDEFIEIEKPKAYIPD  
AGPTQGVKAYPDATM  
RCFVLQPKEKIVISV  
RISSSLGKKPSLTSE  
VLQDLEDKIRALKEN  
CCPDMITKFLGVIVK  
GVAQANIKNGKHELLM  
DGTSANSKMEGLESK  
EASEGSIKLPKMKLP  
QYIFEFDKNDRLSSV  
EQSFYQLKVVASGGT  
QENTLTVKNKEGEIH  
VLSQVYSKVHNGSEI  
RHSDGTEKNKLPSQP  
IKEVEQSKATSQELS  
LQTLDDTKFVHFIDA  
PIGAAASKEYSLEKN  
FKSVLLNKTIEESLI  
RPGQQDGKEGSQPPP  
NPVEARSKYDVPGPP  
AYLGPTVKPDDKAKT  
GTSQISQKIIPLEL  
VSHSPPPQRSSPVT  
FGGRNIKKQCKMRK  
TVTIVDSKRSDTGTY  
EIIADGLKYRIQEFK  
QTNRYAVKEQLKQWE  
VSGPADQKTGTATVL  
DDEPEEGKKRTGKQN  
DVIEVTGKXXXXXXXX  
RGWTFHAKGLWLYLA  
LILMIFSKLLKHSVI  
DTGERPLKSDKSNK  
XMDVKERKPYRSLTR  
GEVTEAGKAYVPPRV

QNI A A F L K E N H D I D D  
F A N F S G G K I T K D V G Y  
L F N T R Y A K A I G I S E P  
K D T T F R D K K S S L M E E  
E P G V P T T K T P A A T K P  
E F G R L H C K F V V Q T S P  
Y S F V I D G K K T T C K L K  
I I S Q F T E K I E K M Q E L  
V T G Y P Q P K V N W Y L N G  
A N V S E G E K K T E E S S Q  
A K R A E L E K L K S Q V T S  
H A R D V V A K L S E D R V S  
C C E L A F C K I I N S Y C V  
D G E G R P A K S Q E E G K R  
G Y E K K R S K L I G A Y L P  
S A V A P Q R K M P L D D T K  
Y R Q N Q E L K V R V E L L H  
K S P K A D I K S P S L D V T  
I D S V E C N K L L A A K N I  
R I K Y I E F K K S T V I L Q  
K R L Q I L L K G Y G E Y P T  
D A I V T W Y K G P T E L T E  
L P Y M I R S K L K L L L Q G  
X X X X X M K K E G S S G S F  
Y S Y E T I G K T T K T P E D  
P R T E I S D K I T S E L V S  
K K D K K D S K T D N K K S V  
N D V Q S E L K Y K A E H V K  
V T H E Q I R K E T E K T F V  
Q G L N F T S K T A E G H P K  
R H H H L V R K T D A V Y D P  
X X M R L L A K I I C L M L W  
S L L V A G L K K E V Q A L I  
L K V L G T R K L M H V A Y E  
H D P I M G N K Y A A N R K S  
V A G S D T T K S K V T I K D  
R E L R E R M K P G F E V K P  
L T D L Q V I K N E T D A R W  
I A C N F E S K Y Q C I S K S  
S E L S D Q Y K Q E K L I L L  
E R R E V T G K W V R V N K T  
K T S E D I I K S K N L R S I  
T E N A I M L K R F N R Y P L  
P I R F D E I K A D S V I L S

QENEENSKNISTMES  
LPSEDLKELQKQLE  
TILDDPGKKVKKPAP  
GESTTDWKQIRSIIM  
TTVGLLSKDSGKKLG  
QLQTTFTKALQDSNR  
DDTYLQLKKDLEYLD  
QEKPSRLKQRFLRR  
NYFHEILKTIEEEVK  
PTDFEWLKQSRFYFK  
VTDYRDMKSDSVAKL  
SEFVRFSKTENKITL  
SYRTYSEKEGPEKKK  
VLYDYVNKYHWEHTG  
VIRTTHFKVTTISAG  
SLSPQRSKLRIMSPM  
PHDIPESKDCVLTIS  
KLAAQMQLNQQRAE  
VNCKVLDKPGPPAGP  
EESLIYRKKYILSKD  
KAHVTDPKADPRALL  
VAHIIDPKAISKDHL  
KHLASHIKYREEYEK  
EFQREELKAKQVSLT  
FPNGVERKDAGFYVV  
QQISFTEKGSDEKKP  
RVAAVNVKGMSEYSE  
EKQAELDKVQAKFDA  
KEYTIVVKVLDTPGP  
RKLALTVKGKELSEE  
VTEVTSEKCVLSWFP  
PDLDLNLKGPSLKGD  
DLGPERRKSTTELT  
GVEIISIKPSAGHLS  
PTMRDDPKLVWFEHA  
PYWLDEPKNLILAPG  
LENAASLKLFAAGSLA  
ISWLREP KSKPQLID  
REQQLVEKSGELLAL  
DPVQEPNKSMFEKTK  
SVSKSGR KIKGRGTI  
SEHMDDSKQESTTSK  
FEGNTNTKGHVKNFF  
QGVLDTGKKLSDDNT

LFSKPASKEDLKQTS  
WFPASHVKLLGPSSE  
MHISSQIKKTTDLTT  
HIMDQHWKFCVECEE  
EEVPPPPKVPALPKK  
RQLENSKEYEITYED  
HEENISSKMKGLNGK  
EEVQLTSKQKEMLQA  
GKVLVREKRVDLIQD  
SPGRCTPKSSEPAPA  
FEPPFEKEANIIVD  
KEVWNREKLTQKSL  
GLALIQNKKEDVSSI  
GILEHQYKESTTYIS  
AQSQQQKHFSSLEA  
LQVANFLKDSYTALT  
SLPPLPFKRGGGKDG  
KAENDRLKVAPGPSS  
SRATPPTKAVDPIDA  
HDAHLNGKVIGTLKN  
DKTSDGPKLFLTEED  
RGTSLVVKGLKENVE  
VNWYFENKLVPSDEK  
EGELESLENLPFTM  
ETISTANKANAERLK  
ISLPNIRKPDGYDYY  
DSAHGFLKVPPRMDA  
QAWSSLGKRADQRKA  
NPDDGARKPIPRDKV  
LEELSGAKISDLHRE  
EEHMEQQKENMEHLK  
SLLCNFTKSMEEDPQ  
LTENQFLKQLQLRHL  
IDYYIVEKRETSHLA  
HKRRPKVKRSKRRK  
LSPAVRQKETVKNDL  
GHQNLHQKIQYVVRL  
SAVSQERKLQNSMLK  
KRLEQQRKDYAAPIP  
NDWFSNIKVNKKECF  
TAFYDSLKLVRAEQI  
RQPPDRFKFTSVTDS  
KMRVLQEKKQKMDKL  
LEAIGAPKPAYPYLE

QENLNSMKKRNVNFS  
HPVEGHQKLDSSPDP  
IENQLAIKSKALDEL  
HYLQENLKSMEEIQG  
RAPEHSNKSKDRDNE  
VVLQRMSKHKTELKN  
MDAQTIACLEKAFSE  
YSHGENHKLVSEHVQ  
EDDVTDPKRPLSFGV  
SNMPQSLKVGSFIE  
TKGGWQQKSKGPKKT  
YTITLENKLGSAATAS  
VKKENRGKGGAVSKL  
YRTYRAAKLQRENYI  
YDYESYEKTTTRTSDV  
NLRKQYEKSSRFMKV  
KPGEMEKKMKILRES  
GPFTVVVKESCDGMG  
FEELVEMKSNYYYSFI  
VATSRSEKEQLQALN  
LSFGVPRKAILYPHE  
EWLRNIEKVEVEAVN  
AIAAQVWKLSTCDLC  
DIHGPDALKKGPKLK  
ELHRTLKVNAMVQ  
KGDSPELKPRAVHKQ  
NFSAAETKSDKKDCA  
VPMTEETKSITLFPD  
NTARLEIKSTDFATS  
DFQAANVKSSAHLRV  
YDEITDLKQLTVVME  
LNTLSEAKVETICHR  
FRTWQTRKQFLLYRK  
NRLAALPKGRPDRPR  
EIVATASKVDIAPHV  
ALTILRRKDESETEW  
LPLHDSLKLLQEQLT  
TNRGHTVKAVCESFH  
VVLPPIMKQPPMFSP  
CGAQAGIKISSVHKR  
DPPPFMFKPVKEEDD  
IHDQTQFKAQNLEEG  
PTLLSLFKHECSRVI  
LKALRVRKKTGGEKM

QQKELLNKRNM EVAM  
IFPSNYVKPKDQESF  
EASKEIAKLTCVVES  
PTVTWLRKGGQVLSTS  
RVAELQRKPTRESEY  
CTAQLNIKERLIPPS  
DSSLLKTRKHKHKKH  
VSRAPITKVGLKGVE  
LTRSPRVKIDTRADS  
PFEVTWLKNNREIRS  
XXXXXMSKLSFRARA  
LAMETIDKAKEVGAT  
LSMSTHFKMLKCLVE  
EIYRWPIKESLKAMI  
ECSSSQLKASVCKPF  
EGILMHIKPENHCSE  
HPDNQQLKNEQEESI  
LPARQLWKWFGKPTQ  
INFLENLKILEISED  
TVLLSMSKGGKRKDS  
PPATPPPKTRHSPTP  
QMYEFRVKAVNEIGE  
LAIESCLKGLLQAYC  
QPEDDDVKGQWDRLV  
QYRLLSLKYHPDKGG  
PVRPSVWKKHGVVNT  
TPTYITAKESQQMQS  
QGLASLRKSANKLKP  
WAGYLITKVRHDLAS  
KRMAQDLKDIEHLN  
SLSLSNVKGHGRADE  
PTPGITRKEEAPENV  
KSGRSKEKRKSKHKL  
KAREFGKKVQEEXXX  
VIQCLRSKEVFGFYN  
AKSPA EAKSPEKEEA  
EVTIMEEKERAYTLE  
NAKGMVEKWLQQVEQ  
LQEQIVQKNQEIKNM  
KKEEVEQKKNEYNFK  
KVKSEVNKLYKLLEI  
KLQRKKKKRKGSD EE  
SEEDLSGKHDTVTVS  
DITMWLSKRLPQFLQ

RKSKHKLKRRGHLS  
DHLRNGSKPKRKNYA  
QCDCWLSKSEGDGQT  
ETYPRPTKEDVYVVG  
SIRENGAKSQDPFC  
QVQITQEKMREAEK  
IGVLAQSKFQAVRKK  
ELHTEPMKLALSIEA  
RRAPSPVKPASLERV  
QVIDMSVKSLTLKVS  
PDRTVAEKRGRKITL  
KKEPDDAKAKEPSKP  
KASLFINKEDVYEYY  
IDIHYGVKSNSLAFI  
MAGLGVEKLEKLMPE  
LSCSQYHKMYRTVKA  
PGFQGRLKYNAFCEL  
LEVLSGQKLPCEQGR  
NWLSNAIKEFGFSGL  
SAMQSLIKYSGSFAR  
QMFLNDYKEVPFDAL  
RKESITEKKPKKGLV  
EKQAQLEKELSAALQ  
HALAIAEKSQEFLEA  
SNDSTHFKALHSNQA  
LFEVALPKTAHHFVI  
SPREESNKRQRTYXX  
LLPTPEEKPPPKRI  
KLKEQLTKVKECYSP  
DMNIRGPKVDVNAPD  
HDKTAVEKDEITLKC  
KGYVVEVKEAADEW  
EEPAQGGDSIEEI  
SLHGTVMKINQERAE  
EPWTTDAKIQKNCP  
PGIDATTKLNVGAPD  
RARGHAVKNSSHVDR  
QVFFNMVKETTSNCF  
SEECTSRKPGQTVNN  
MFCLEQEKRLPFSKR  
GSEQDGWKAEPGEGT  
RCICGLYKDEGLMIQ  
SLQFEEDKENSKEI  
QSILEQDKLTPESTR

VFVGRAQKNQGDRSN  
LTNVSRAKAEDALSE  
FRVRAVNKAGESEPS  
PPVTSPLKPNTPPSA  
KELDLCEKVSQYTG  
VTPPAGLKATSYTIT  
TETQNALKEEEERRK  
SLEEIMDKAYDKFDV  
LYCSMNSKHLNGTIT  
CNNVSSDKIGDKGLS  
PKTAKPKKAAPKKKX  
NIAIEFNKPQYFSIM  
LINGAEEKILED FRK  
ELEALNGKHQQISGR  
SASPAVTKDQYSATS  
STETIICKDEYEAPT  
PDVNVNLLKGP KIKGD  
MHIDTVLKEIAKTVL  
SFQAANAKSAANLKV  
DLASLPEKAAANEEG  
FTLPLYNK TAYVGEN  
AHREIEDKPVATSNI  
AYFVPMSKIADFLKA  
SQYTYALKEKAKYQC  
ARLDQMRKFRRQHEQ  
DLEYLDL KMTGRDLL  
HMVALLDKDQAVAVQ  
KEIDMLLKEYLLSGD  
QAMGHRHKAGGAGRS  
SMLEERIKRS AKRPS  
KKS LLEEKERFQREV  
ASSMTEMKFASMSAQ  
ETSKVTLKEQQHQL  
DRLITLSKKKAGHDQ  
CYYHVISKVPRIRTP  
PQKTAFLKDRLNAIQ  
KPSVGEEKDIIIFVG  
ESLMQSLKMNIFRLQ  
STAELLVKAETAPPN  
EKLLRESKELADLAR  
DTVVIASKPYAFDRV  
LPTKASSKAELEIAN  
LYICDYHKNLIQSVR  
VEHPQRSKKAVWHKL

EACIELEKIVGELKK  
TRHLDKMSAMRKGH  
FLLNEIEKEEKEKLW  
CEVTGTIKAVDRLTA  
STQTESNKKMEENEK  
LPESGATKVEDMLTL  
ALCSWTAKKDNHLNF  
SGLDRMAKHLSQRKT  
RLQICDIKPRDQGEY  
NNCDYEQKERFLLFC  
KQEIMTLKEEQNKMV  
KIQFLKMKIAEKQRQ  
TVAQYPFKVPVPGPGT  
ERSDTNEKRSVDSSA  
KNLWVSQKRQQASFP  
NRDSQSEKDDGSDRD  
SSRESVSKAGMPVSA  
EDLSEELKKENPFLR  
LAVEIRQKSFQPKHP  
RQENMVLKLANQKNK  
KSEAGGLKQEIMTLK  
EATENTLKEASVESE  
EGLKDDEKLEVSELA  
THRDSGFKNVGDITN  
NCERELHKLEGNLKL  
LSNLEEAKKKKEDAL  
NAKCIHTKFQVFKHQ  
KEEAQLQKCLGQVEH  
EITVSWYKGDTKLRP  
TPEIVLAKNNALTMS  
ANVEGDLKGPALDIK  
LLPVLIKEQLEPPE  
NSAGLLIKAYNRAGS  
DLVVDVGKPLTMVVP  
LIEPSVFKEAATPEE  
GNPFQANKHGERPVD  
AELRIELKKANNKVC  
EIIHDRIKREYGLET  
HVYYRSKTTTHIAT  
DSEVDNQKRGKRHYE  
DSGNYILKAKNVAGE  
GTRNYRKYRIGYRLQG  
SLLESVQKLDLEATI  
NENSNRQKLEHVKVN

VGASQECKKEADEQL  
LQEERTCKVCMDKEV  
PSLDLSCKQLASGLL  
MEVHEGDKYRMHSDR  
RQYCFYQKLQWATKI  
YVEPHELKEVSQTGD  
IQNERLYKEDYHKTK  
TVHDFPGKKLVLSSE  
GPPEGPLKVTGVTAE  
AELQEMWKRLGHELE  
YFHISPIKLHLSVSL  
DAELRNTKWEMAAQL  
PQVSGELKGGVVDVN  
RRTTQSTKHGEVDAW  
SDNSEYSKSEKGNK  
PKVEGEMKVPDVEIK  
ENGVGEPKSSTVSVK  
VRQDSPTKRPALCIQ  
STTKRSPKPPNKKKT  
DFLAEIFKKIGSKEN  
SVAWFHEKTKIVSGA  
LDYELCQKHEMTISA  
TPHSHREKPGIFYQQ  
ENLVLQAKIHMPEKT  
VVERRDIKRKTWVLA  
TTASAHLKAGCPMLA  
NEARINAKAKRRLRK  
CCLTFLVKVSKALL  
LRQCMLPKSAALSEK  
AYEEQKKKVADHPNR  
MLRDLQEKINQQENS  
QVFNQIVKSRPHDNI  
PQCVAIDKLLKCKSS  
SDDYDRIKCHVDEQS  
CVGSIALKAPPRFVK  
QFMGQAFKSIHEKVS  
LPTRALQKIQELEGQ  
GHLNPSEKLQKLNEV  
LEQARQEKDKLPLEK  
PAYDGGSKVVGYYIE  
ARHSGHHKRRKEKK  
FDTDTGLKQALETVN  
IPQILAKANAINMS  
FEDSGNPKSPDKAQA

SNINVEAKFNTVVVSQ  
QQIRPIKSVIPSPT  
QLKASLGKVGVKEEL  
AVYAVLDKVKTKKST  
IQVASNAKVAASRKP  
SIEHQEIKHTEFLKE  
LYCLSDEKLIQKISX  
IPATIQDKLIIRFTV  
PQQTQMKTKFTSP  
LKEEYSRKKETISTA  
LSVSESQKGEERDRK  
SVLRECDKLRHDGYR  
WEESQTQKIQNLEKL  
KSTRSSVKLQGTSKI  
GTDCLAEKEKVHVIG  
VFQREQTKQVEELSK  
SSEPWEYKSSGNRA  
PCGRWLAKNEDDGI  
AGAKSRPKKREGVHL  
SEPSEFYKAADPIDP  
GNQTTALKHAKDVKD  
RGPGRPRKRTHAPSA  
VTDEPLLKMLLTKAD  
GMDNQGHKNLKTSQE  
LPSPCKSKSLGDLTS  
KPLDLRPPKTRAMRR  
STFVDQCKTVLKLAS  
FRICAINKAGVGEHA  
NEIHTNHKTLYDLKT  
NLQDDLEKQERSLQK  
KEMTNHQKRAAEMM  
IRTEQESKGPMTTRRL  
KVEAPPAKVSKKIPE  
EKARDREKAQELLKF  
SGGLIPGKSLVFATM  
MVVLVQEKENDYYCS  
LRSAPAYKMQFKNNV  
KKRLERIKSSRXXXX  
IVCPFFIKTGMFEGC  
SNCNGEEKKLDDSCS  
WLQETDHKSIEDQLQ  
CLHVSAQKMLDGASF  
RKYDKRRKKRAPKAD  
EIATSQLKSDLTSRD

LVQWVVQKVAWFLQI  
TFAFNQMKPKSIPYS  
AFQDHPEKSEQFEEL  
CASSLPIKKIAGSNY  
ETRRYALKNVTILVT  
LDENIFPKQISLRQA  
RKVEEIVKDHLMYLD  
LGPEEVRKSALTLM  
IISEMESKLVEQQLA  
PPLVPAIKEDAGGMI  
DGYEFFAKRQLVTLF  
PALQMAFKLGLSYTP  
MHSNSQDKEVTILAE  
IDGLSGEKIRWTQQS  
GIIVRWCKVDDDFTA  
ENLEFHIKVSYFEIY  
EKQIEQQKKIQMSNL  
KRRGPKKKKMTKARL  
MYLNILRKKITVNSS  
SDTVHQMKPYLKKS  
QKPTKAPKKPTSTKK  
KDKPLIYKGEKWL  
QDLRATAKVPSPDE  
FDSRGDVKVIMATNR  
LLGQAEDKAEVDMDT  
PELVQAVKNTAMFSK  
TSTLRHCKYSVTCLI  
LDERAFEKTLTPHIQ  
DFLDFMTKINGLEVQ  
LRWVRAIKTPVSDLR  
PEMTTTAKDKTTERD  
AASPLEPKELEELRD  
HTISVRVKAAPYWLD  
VENPAGSKTVSVKVL  
EKKAQLSKYKSLQQT  
ILDITDVKVEDSGSY  
EKSPLPQKRITNIE  
QAKIQEAKEKVQINV  
KLKVEAVKIKKTLKN  
KSALGFIKVAVTVMD  
IKVKSEEKIKVVEKS  
RTWAEAAKTVLEKYP  
TVLHG NRKDNELIRV  
VKQAEKAKDSVYKRS

TNGEHTSKATLELSP  
DFACANNKICDELEE  
LHSNPEPKTFTFDHV  
TVARTMMKVMKLTTG  
RGPKVDIKAPDVEGQ  
ISLGEACKKVFLDCC  
LGYHVERKERNGILW  
PGPCPSVKVKEVSRD  
KVTNQVSKQKYKEDY  
FTCPHCAKVCKTAAA  
SRIDALEKAGQKLID  
NVDISAPKIEGEMQV  
NALNVS NKLYREGWD  
ALIRTLGKQLNVNRR  
VTLVEAIKQVVKHLP  
ISVEQDGKVKTLMEF  
HQNTMEDKFIVCLNK  
NLNSLCRKYHSAELE  
KAAALACKKLKSLGL  
PSVSTHIKVKSEEKI  
DEEEVSDKGS DSEEE  
VGPDGLMKLNGSALN  
SSEHDVLKEAVLKKL  
STYHIPTKAEASTSY  
VTMDSAPKPFTD VSI  
LVSDNNLKDYFERGR  
GLRPILTKLYKEKGV  
LQLWQRYKDYSKQCA  
LGIENQHKISVPRAP  
DCQRIELKQGYTFVI  
TDTVSDVKYKEDLTW  
EPPSFVTKPGSKDVL  
EQWLDDCKRTFGAKE  
QEVIGKLGKLCPSVA  
ENGSL EIKMIRKEDQ  
MEEIENLKKQHDLK  
LQYMTMAKLQKEFGP  
FRRLQFNKHGVL RVE  
NAFLEFSKEVDAQSS  
RDHLAEAKEKLSILE  
QLPLSRIKFTGKECE  
WRESSLLKNLWVSQK  
DLKTQAGKDDKGKRRK  
KNNGQFVKASASLKG

LQGPSDTKDLHSTKW  
KKEPVTRKAGLLFGM  
DSAEALLKKHEALMS  
QTYGSTLKVTXXXXX  
SFDFLAEKLQFYQRQ  
SAPAPQCKALCRKPE  
ATGLDEEKRARCDGK  
KPENLSSKTRGSIPT  
SCASNSVKFGVEMLG  
AGPPTPCKPSSPGAD  
DSRVSSAKLNNFSRL  
ISPTNPTKLQITENG  
QLLLEEIKSSKDQLK  
LKNVSEEKMAAIVNQ  
QKNSTLPAIVSSRD  
KQLEKMRKFLDEQAI  
LFNWYNRKNCILADE  
NDDISGYKENYTRWL  
ITNYIIEKKEVGKDV  
FKIFRETKENEIQDL  
QRVRENQKNFSLQY  
SRLSTIWKGFINMQS  
DPLVTVMKVEKAPQE  
PELPLQTKDAADGEA  
KRCKLLGKSSRRQD  
VSFSAGVKVRFLGG  
LENMQKLLIRMCPY  
LKKRKGRKPRWTKVV  
VETICHRKEGGSLI  
KKETTVKKAVVVPAR  
VFEYFNAKSKHSWRK  
PSVENRPKIAAFLPA  
CLYQTNSKLYESLTY  
QKLVYMGKLEKESF  
AALRPLVKPKIVKKR  
ALRAEVSKLEQQCQK  
KQKLYHKKIFRTAML  
IISDSQIKASEFLGY  
FDTSAAYSILRKKV  
DELTTEIKELKETLE  
EILMSLQKVL SGLGG  
KHGFSVLKGQAELQM  
NRVNHIVKKIETENE  
TYVAQFLKHYPDIHN

YGVNGVVKILKKINK  
IFRLQTEKDLNPQKT  
SESELESKESQKDEK  
SPSPAPEKKEKTPEL  
EAPLPSPKLEGELQA  
ASPDEGWKRCNAAAQ  
CLKDDTEKREKDEE  
DEIRTSKLNLNQFLP  
YGAVTYRKS SRGPKQ  
KVLASYQKTRSAVIV  
NTMMELRKCCNHPYL  
KFRLEEQK VRRQEQE  
YGVFMLHKKT VNQKT  
FAPDPENKGTEVCMV  
XXXXXXXXMKKGSQQKI  
VPTQPLLKAHPKFSK  
RISDAENKHILELSN  
KQVTQESKEKKVSEN  
TFYSQREKPGIFYQQ  
ENYQTLPKSTRHPSG  
DCEEAFKNPEGKPR  
RVFCSYQKKGFDIKW  
TLTETRFKTGTTLKY  
KQGDELAKLSSSFKA  
GFNTSQGKLLRTILF  
PIETERSKCDITGLL  
HPTEEALKISVASEP  
EIVECILKRGQKATL  
PEDKKEEKEKPKKEV  
GSDQERTKKKRRGDR  
PENHNNAKEPDSEQQ  
SELSQLYKEAQAELE  
VANVVGQKTASIEIV  
LSITVRTKKQELSEA  
EFEQIMLKAMQEFTL  
QEAMLFFKKSEQEKK  
FTLQYLNKLSMKPEP  
PRKAKEPKKAKEHKE  
APECMALKADVVAKK  
TSTPLSGKESVFFAE  
EIMEHRFKTYQQFRR  
YLFIQTDKTIYTPGS  
LEAVRQEKQKETAKC  
SEFSSFDKNDSRGQE

SLLTFIDKAMHGELQ  
FREGQILKVFGDKDA  
KERISAAKVAEPPQR  
IKASDITKSSCKLTW  
EVQVLDDKNVRRRFR  
FHKLNIPKLDFSSQA  
DAGLYTCKVSNDA  
GSAQTEETLTKVSATPGP  
EDSEQELKGYACRHC  
LNINPDRKEHNCREE  
NFILLFYKVSTSSVV  
LLDVNLAKFLAQDVP  
FSTALYGKLLKLPTC  
LDPESQRKRTVQNVL  
KNSNGIPKLYIPLK  
SSAPSSPKLQHGSTE  
KLEYIYAKQQA  
LEAQDQLKLQEKDIQMWKV  
RRVAQAQKALSDVAY  
KESARDPKPEASRAS  
DRMTEESKVEAELHA  
FIRTRLEKEGIVFKS  
YSSVSQRKYYSTKHF  
KALLLEAKQKVP  
PVL EANPLTWKQLLCDLV  
IAEELSYKTAHEDIS  
LQNTDAHKRAFHEIY  
CKATLSEKLGGA  
EVAKEETNIVKLL  
EKQYQCNSVHLCKQLVESGA  
LITPEDRKYGTTNLH  
LLDYQDHLGADSHAG  
TECHARFKTPEDAQA  
ATVNIQLKGTNEYVP  
KNLDHVNKILKAKKL  
ANQGCVRKVYLKDTA  
LQQATPPKNYQPAAH  
LCSQLLCKDPAERLG  
QEEVIEVKVPAVHTK  
KTKRISAKKRDVQQQ  
CLTENVLKEIAKAGR  
EDEETDQKCSLSSSE  
LISLQEAKDICEEQV  
LRNLVHSHKHKMIAMG

IVCSSEIKRQVVETM  
EPPRFVSKLNSLTVV  
NCRCEISKSLCCRNL  
STGGEHKKSDRKEEP  
AETLNQSKERNRFSL  
SEPSELIKVLGEKPE  
VAGGAISKPLTDQTV  
AFKNIASKIANELKL  
PVLQEEIKESQDPQH  
RSLVEQHKRERKELE  
VPGPDAQKTETPSVS  
QSISENEKLQKLER  
DLKGTGKLLDERLV  
GKTGNTKFRFRQC  
KWIQLEKIEEALKV  
VTAPEPKIPDVAPI  
VVRGWLHKQDSSGMR  
TEVELFHKDIEAFKE  
LTKQIQEKQGQSEL  
VPTFTIPKLYQLQVP  
MGLKGPLKTPIAAGH  
VVYCEELKCWCRAIV  
SSEPTKEPPGQLQ  
HLRTRVQKVQVKEEP  
GRIETDTKVLEILYE  
LACQENCKKTLTIE  
IGTQTNLKCRRGIEN  
NSKVHKKKKHYKPSS  
EPIRNSVKERESERN  
SVTRSTFKFTRLTEG  
TEDLEDAKKELAIRL  
PDSSPSRKPPPISKK  
IPMAPSCKLLFEVHN  
VIIENVSKSTSTSEP  
GVNLIRSKVEDPAVI  
PICRGIKGTVRTFL  
CTTHLYIKAPAKFVK  
LVPGNIFKSSGLTDG  
RAENLRFKEEGVRDV  
EIEVSQLKEQSVLEF  
IENIDFNKSGSSTAS  
LEDEAARKAKQGKEN  
LVAEFPEKEAQLSLV  
EISLNHNKIEQIIAQ

QSLKDLEKEFVDFWE  
PLGLIMLKTSEELA  
GTAPTTLKEPAPTP  
VSVNVSSKEFLQTES  
LSMGTRRKVLVLGSG  
LKEEIKKKKGIKEEV  
EFWDVIQKHCLEAHQ  
NVLLTCCKDNVCRLW  
TTASNYNKSESQESL  
AKRELESKLQRLQAQ  
TIAEQESKLNEAHKS  
LKQQAKEKQAQLAQT  
QLSLLPNKDLFIWDL  
ATQLEQMKEDYSYIM  
HQPVSFYKLLTNNT  
VRQVEALKAENSHLR  
WLQDVDDKYDRMKTC  
ALGMHESKYLILPVH  
GAVVEFVKELQDIEV  
CEIPVEVKPKARLLR  
RLGSPSGKTGTCRIS  
QDLLHTTKHQDVLLS  
YVHTNGPKKKKVTLH  
LHEFDSLKDPEVNEF  
LEAENQIKKCDIRNK  
KQLTDNLKEKALSFM  
KEIKKLPKDAKKSST  
TKMDANDKKIQSLEK  
LAHWSPAKLLLQMDS  
LEELQDLKGVWSELS  
LEEPMFHKLIEAGET  
AVAVARQKDSGGSGR  
EHLGCWKQCPSCGA  
SELHESWKYNMSFIN  
GFYVCAKNRFGIDQ  
SHNVQQLKSRLMTA  
KEAYEKSCKGKHVGR  
KLRLMEQKFQQVDEW  
IFHGVMGKDEREGNS  
NMHSARFKNGKQIRK  
DKVDGLQKQTESSD  
HLKQHCKNVLLRVRM  
NSDQHYSKESNYFYS  
TGFALNLKPLAPAGI

DGNHLYLKIKNAMPE  
QGLPGPEKLPGLSRK  
PDFERVNKRLCPTTS  
NKLPLPSKSVDWTHF  
KFTMVKNKALRKGFP  
RQQSSSSKGDSPCLK  
KEFSDLEKKFKDKSQ  
IGSLDVEKCKRATEI  
ISLNDVSKAEGILLL  
VNLHRIEKDVQRCDR  
AQTADPIKVAEVPQP  
FPLWESTKVVPLSKF  
AGFEDEAKTSARDAA  
CVSIEGYKTPYTDVN  
AFEHFAQKGPTWKEP  
LSPDSFIKDNYGLNQ  
SGEQVDGKGQAGSVS  
LEEIRQAKAQRKQLH  
VVEVFLEKFTTEWDN  
RANKKKQKVFQHNEL  
LETGDRVKMKTLSAY  
AEREQVIKLGTTNYD  
DYCLDIKKFEVSEE  
DMDEAIEKGEAEQSE  
SSLSDDRKWIIFDGP  
YCTSPDFKMGGASDV  
FGVPSEPKNARVTKV  
AMEESPRKKKKRKQE  
WELYIPPKQNKSVLV  
DSTADDSKDSVAQGT  
VIQFELGKQKNIMPL  
GGLRRAVKVQCTWSE  
ENYIEELKKQGFLLR  
SFLLIASKSVNMKKE  
TFRWTSCLKHSRSEPQ  
IQESSPTKNNIAVSS  
KEAVYEKKQAVHKEK  
FLAPVFTKDEQKHRR  
NQKRAELKLVVDRLQ  
HFQTHLAKLLETQEQ  
QRRYLEKRSKHSKK  
GRTDLSKGLQSPRG  
RWIREIQKVTKLDRD  
KDKEEHGKIKREELD

CSGILTVKEPPSFLV  
QKQFRLFKTAALVIQ  
SNANMLRKGPAEDMS  
KSEWMDLKKEYLALQ  
TICSAYLKINSKGEG  
DFPKVRAKEQTFMFP  
IYTYFVYKTRNMDMK  
KFAECLEKKVDMSKV  
SIKAFAEKLSVKLKE  
IANITALKDQLLAAK  
VMVKAYLKKYDPEVQ  
EKSLKRIKDTNKDIS  
NDLSTENKLVKHD  
KMVAWFEKSKDIIQS  
KYRAALGKLPQQAND  
FHCNILMKDDKDPQC  
PDHMVLGKRLKGAFK  
NLSVTSFKKIVYREY  
VVENSEGKQEAFTL  
DTCVCTVKLKEPPRF  
VQAENLVKEASEIPL  
GVNSLEVKFRTRSEN  
ADLGVIIYKIKLRHDN  
IQEVEYVKEEAKMVY  
FGNAIEGKSNTVASL  
SICQARAKELEDSLQ  
ISQLTEEKNDLRNMV  
IPTIQWIKGDQELSN  
GLSLEDSKKLTAAPS  
LLDSPLNKEVVKUSA  
GSTFPDVKPDLEDVD  
RESVNLGKSEGFKAG  
VVDSGLHKEERYDLK  
DTVRSSFKPGLEARL  
PWMRLFFKIKPLVKS  
SSHEAEEKLSEHKAL  
KLKVKDNKKNRTKKK  
GGGGMAKASAAELK  
TQTPVSNKKPVFDLK  
DFLIQTFKVFQKNQV  
NGCMNRFKNALNSCD  
NIELVDLKPLPTARR  
RVQEAEDKWRGAQAL  
SDLHVNAKGPQVSGE

LYTQLEAKKAAIKPL  
FLENEDTKFSLSDQ  
CLIHPRIKVGNEYVT  
VEVPTVTKRERKIPE  
SSSEDSEKVIAGLYQ  
PVSMICKQEEKLG  
MACTWSVKEVASYQP  
AQRARAKEFHKKTL  
GQPDEELPKKKVFE  
GEVIALDKIFNKVEK  
TLEERLDKACEPGVD  
CGRWLSLKKEDGRLE  
RDAAELEKWIQEKLQ  
INLAGVGKPSLPSEP  
GLGKVGSKGREAPLM  
RVTYSPRKEKALKIY  
ERFDVGPKEKPLEEP  
NEVINSPKGKKRKEVE  
RYLNEEYKKKMSYMI  
AVYTCEAKNDYGVAT  
QSSGIGSKAGVPSKS  
QMIEKRSKLGESQTL  
SDPTPDGKLFATQYC  
RFTMEVPKKLTEWFK  
AGAGETLKQECDSL  
DAHEDSFKSADESGQ  
NVFNLAAGFSEGTA  
EPHIQPTKSSSRQNI  
EPQLNRLKEKAQQLW  
MPIVDKLKEALKPGR  
LDVEIQDKPKPTGP  
IVSALWEKWLSLLEA  
PGLELMEKEVEPEGS  
EILINNFKYIFSHLV  
NIQNWVYKLSSTSDI  
TTMDTNGKPLYILTY  
SDAGIAGKVERNIP  
EEAGGSVKEEAGPEV  
RLGVSLSKGLHHKAV  
ELALARMKDLGIQCR  
ELLLGHEKAPAFRDY  
EVQISTEKQKNSTL  
KHRLRELKLQVKAF  
RMIVRCRKQDFPLVK

LGSPTYFKKQFSDPV  
EWIVESIKAGRLLSY  
EHHPRVAKYAMENHS  
EEDEEEKEEDEEET  
KTVPLTAKEERGMGA  
GDPIPNVKWTKGKWR  
HLTEETLKVTAIPEP  
LEAMLRNKELKLQES  
ELTQEALKVSAVPQP  
RHIEDLKFRQKVN  
EIAPEEEKPVPVAEE  
LPEPPVLKVLSSLKP  
SKGIAFVKFARSSQA  
NTMDVVFVKEPSFDWK  
VTVIGIPKPKIQWFF  
YIAETDEKKINRIRQ  
EQAEIQIKEESKTAV  
LQTGACYKSLPSRNG  
WRADINSKKVLREAG  
EKLSILEKEDETEVQ  
TKIIIEEEKKTLELKD  
LLAPHRQKWVERIRY  
RWKPM SVKHTEKLER  
KNTGELKKS KVL SHH  
ARCLRVGKLNIDRLY  
VRSSGYGKPS S PLKM  
SAIIIQRKWRAILPA  
TVIQSAYKSLIQHLE  
RLAEETEKLRAENVF  
ETREDRTKRLFRHYT  
PMIPQSGKQHLLDFF  
HERSRRRKHKRRPKV  
EFPLPDEKTKKRIFQ  
TCASAVQKTTFRVTR  
ELDQDLAKAYLTVLA  
EQNHLYLKTAAVVT  
GLLGASFSTGSSVP  
RLSSWCLKKPGHVAE  
IISLTPKHLQAGMQ  
EFSDDIVKIIQAAN  
YLDSTFTKRDPRGEY  
IVSNEAGKASCTTHL  
NDNAPIFKEDPFISE  
ENIQTLLKSKEQEVN

PVLIPEPKIRAVSPH  
DRVQAIKGTQRLV  
STGPITAKDEVELPR  
HRDAETKEWIEEKN  
LEPDLAEKNPPLFAQ  
ENIHSRMKTVKLPKK  
VPGFCLPKKGVTSIL  
VKAGEVLKINADIAG  
PGVQGDVKGQVALK  
TKHLETSKQLAAAFQ  
PTSYQAPKHFHIPAG  
SVHSREAKESSAAQA  
ERNIEAGKDDGLTDA  
CSISQELKLSFTYE  
SPQRLCSKHMPQLHS  
VPVPVQKKEAPPAKV  
ALKMSPYKDILETHL  
VSRYGELKSVPTTQC  
QPSLRAAKEHAMPKD  
AKDLEQHKIKQEEIL  
RTLTYTAKPVGIGG  
LKKLEEEKAEAAEAA  
MDAENMRKELAELES  
SPLKEDAKAPEKEIP  
NVSSRGGKKFLPVLK  
EEEVTVVKGQPLYLS  
QEERAFLKVDPELVV  
DSLAAHVKNLLQCES  
KEVMAAYKGKRRSEA  
GLVAQLQKTVKELQT  
RLHTRQMKRTKCADI  
NGFSAMAKTVGLPTA  
QRLLEAQRLEKLT  
KAKAQLCKIEKSKSL  
LPCLSLRKLPPRSEI  
QKLAELEKILESNIKE  
ADSLYVEKIDVGEAE  
XXXXXXMKWVTFISL  
VFRRDAHKSEVAHRF  
DLGEENFKALVLIAF  
CPFEDHVKLVNEVTE  
ESAENCDKSLHTLFG  
EMADCCAQEPERNE  
DNEETFLKKYLYEIA

PELLFFAKRYKAAFT  
ECCQAADKAACLLPK  
DELRDEGKASSAKQR  
LKCASLQKFGERAFK  
RLSQRFPKAEFAEVS  
KLVTDLTKVHTECCH  
DDRADLAKYICENQD  
NQDSISSKLKECCEK  
CEKPLLEKSHCIAEV  
AADFVESKDVCKNYA  
VLLRLAKTYETTLE  
DPHECYAKVFDEFKP  
EEPQNLIKQNCELFE  
FEQLGEYKFQNALLV  
ALLVRYTKKVPQVST  
EVSRLGKVGSKCCK  
QLCVLHEKTPVSDRV  
VDETYVPKEFNAETF  
DICTLSEKERQIKKQ  
TALVELVKHKPKATK  
KATKEQLKAVMDDFA  
DFAAFVEKCKADDK  
TCFAEEGKKLVAASQ  
NECFLQHKDDNPPLP  
XXXXXMGKGDPPKPR  
LDSEAFQKRKQMQUI  
PQLSEYCKMPLKMWH  
IILDTEKCLAGQPK  
KAQAAEMKAVHEAEG  
KVSTEHNKECLINIS  
MHLIQTGKGEAIRIR  
QELISLAKSRYSRCD  
VVFVQTDKPVYKPGQ  
ALKLQKQYLMWGL  
TVPETGRKDTVVKVL  
ALNDHFVKLISWYDN  
AEFAEITKLATDLTK  
SIGLGYHKDLQTRAT  
NCLAPLAKVIHDHFG  
ALVGHLLKGYRHPS  
GRVHESVKRSNCYMV  
EIIQDISKDVVDESN  
VTLGCLVKGYFPEPV  
VFANMQMKLSQSRPI

ADGNFDPKPINTMNF  
VVGYYCLKVPLVVK  
NRTWQDYKRGFGLN  
AEGSPQYKKWYFELI  
GIISPLKLPSLNKE  
KQLRKIVKHEIMSVK  
DGFAESTKRKAAVWP  
LYPMLFNKLKNTISK  
TRHMEAVKTQFLEQA  
VVAASEAKEDSPAQT  
ATAPEDDKAPAEPE  
NNLHLQEKSDDPVK  
EENGMAWKEILNLLY  
QHSPGLDKENVELSP  
TALAELVKHKPKATE  
TVRKQVTKSYKMADE  
EFWANLEKETDWLRN  
DVAVWFSKRLPTFVN  
RFAGPFSKQTQIPDY  
CAIYTYGKPVPGHVK  
DLVPGSFKSQLQEGP  
AAVRQRMKCSSMQRF  
GELLITNKGSELafa  
WLTAYVVKVFLAAN  
ARYEREMKTYIPPKG  
LSGFIPKPTVKKLE  
SVSRVELKPGDNLNV  
RVTAILDKLITMTIN  
NMVIADV KMLSGFIP  
KCCAADDKEACFAVE  
ISCADAEKEIMRLGT  
ANHVLFTKEEHMRPF  
SVRFVCQKGFVLRGS  
VSREINLKDYEGQQK  
QMLFYICKKLTSHQM  
FPNNYWDKFKRKRVI  
GGLVEGAKNIRVTKI  
SSPCSSDKQNVXXXX  
LEEPDLEKVVTYLAG  
RYNMPLEKQQPAFAL  
QYDSTHGKFGTVKA  
KEYDPDGKGIISRKE  
NLLQMTEKFFHAIIS  
DLLVHCGKLCALVYK

PSFSSETKSACKEED  
LMVCNHEKVGLQIRT  
VERSYAVKSGKWYFE  
YAVYLSKSYIYLDT  
MVLSAADKTNIKNCW  
LLKETAFKFKALKKV  
GMRDIPMKYSCQRRRA  
AVINSLEKAFWNWVE  
GMGVPEIKYGDSVCF  
FAYKFLRKILKYVDS  
NSLDFDQKNNKDSNS  
RGNFLEIKNKFLARR  
SLSHSPGKXXXXXXXXX  
NAFERQNKAEGLGMV  
AADFVEDKEVCKNYA  
SVLGMPDKVEDMCPD  
TVKAENGLVINGKA  
LFIVSISKTLANEP  
LQMISASKGEMSPMV  
PPVEPNTKVFPVAVFL  
DQTEQWEKFGLEKRQ  
EIPLQILKTKALSML  
ERAATVTKKTYEIIWH  
FQVELPRKAFITNFS  
EISCWTVKIXXXXXXX  
TDQHGLAKFSIDTSS  
QAELLPSKSVSLIIL  
NTLCDEFKADEKKFW  
PTLSQQRKSQNEQDT  
YINVDCAKLKRLLKE  
SLLNGNSKYMVLVPS  
EAMQAYPKQDRPLPS  
TNVEMILKFFDMFLK  
LLALLLLKDFDSVPP  
VTVQDFLKKQVLTSE  
MSFSAGVKNWVDHMM  
GVELMEAKSQLFLKY  
ALLDERTKKSNRDSL  
ESHQLSKESMAGNK  
SPEALVGKSLYVSVT  
MAPSLTFKEKVTSLK  
PMTVICQKDLSWSML  
KVTSCLKFKEKPTDLE  
EILKSLDKEAIREDN

VTYPGLSKRRLKPEA  
LQLSGPDKVTISLLS  
VAFNFFRKFYNKSED  
VIPELNGKLTGMAFR  
VDESNINKKLFLDSL  
TVYVDAVKDSGRDYV  
RWPSHFQKEAFVKPG  
VREDMETKCFICGIG

### **P-type of cabonylation peptide fragments**

#### **P-type of 126 positive peptide samples**

GKWELYIPPKQNKSV  
PLPRKRPPVTQAAGA  
QRPARRGPPPLARAV  
ASKLQVLPQKASERL  
GYKVLIQPSNRRRAIH  
KVSAAPGPADQKTET  
PASKDTRPKEKRLVN  
GRKSTEFPRKIREQE  
KQRAKKKPNPVEEEP  
YYYWKKTPEAASSRA  
QRNRETAPRTIFQRV  
KSLQAKFPSNLKVSI  
NSRTMLLPLLRRFPE  
EPQKQVQPQVQPQAH  
IAKQSLRPFCTVCNR  
ERKQNLRPMPKKYHS  
SPVQKANPGTLAAEI  
PTLPKRVPRAGEARN  
VVRLSCLPAFKDLIA  
KERKMAVPMPSKRRS  
LKKAGRIPEQILGKV  
ASLKRLKPHVPLGRN  
STKEKAGPKGSKVSE  
VGIPDKIPFKRPCTY  
YQDLGLPCIVILTG  
KTVMGAAPELKVRLE  
AGRLFLIPATIQDKL  
AKARVTKPKTAKPKK  
PNSRFSAPSCGSSEK  
VFKLLECPHLNVRKA  
CSGKKVEPSALACRS  
KEKQPTMPILKNEIK  
RLKNEKEPMVLKLD  
STIPLSHPKIPRCQE

VAKAVECPPRRTTAR  
GSETPDGPLSPGKME  
KQATDVKPKAAKEKT  
KKEEKEKPKKEVAKK  
EVKKETPPKEVKKEV  
KKPAALKPKVPKKEE  
KESLKVGPLDSVTYL  
LFNRIGDPSVDEDAQ  
LGGKLGPDVKLPDM  
KIPKMKMPKFSMPSL  
VDLHLKGPKVKGADAD  
NMPKISMPEIDLNLK  
KSKIKMPKFNFSSKP  
PKGRPDRPRDLELTD  
DSKKEEAPKKEAPKP  
KEEKAKKPEEKPKTE  
ADGRGMLPKRAKAPG  
VVRPEEIPPVPENRF  
RKRVSLEPHQGGTP  
KKATSCFPRPMTPRD  
FPENKKQPYYPFD  
STLERVLPVRFTRH  
VVERRRRPRDSPTLS  
YKPKRGRPKSKEMPQ  
IPREKKPPRPPKKKY  
KIHRNRYPVCTKPYA  
ERSPGGRPIHKRKRQ  
KGSDEKKPFKEKGKT  
RALGVQTPSIRKSLV  
ELIEELHPIKEALE  
NPKEEKKPKEKKKKG  
MDPSAPQPRAETSGK  
ILDLCAPGGKTTHI  
KHTFSVLPGDCQQRL  
RVPRRASPLRTSRSR  
KKKGRPDYAYIPLN  
LLKTHFLPLMEKLLK  
KIKKAASPSQSVRR  
KKAKSPTSPSPPRN  
KKLLVLNPIKRGSL  
RRRAPPPPKRAPSTT  
LPGPEKLPGLRKG  
PDMLKNAPMLKSMKN  
LMEKEVEPEGSKRTD

KLTRCLKPFENSRLR  
SYRTVEKPPKFTEKG  
EIRSHRPTLDALRE  
KVSRTVSPKSFACAF  
KSTLAIDPATSKEIP  
KEPFKAAPHTIHPPC  
KVPIKQVPGGVKQLE  
PAKVPEAPKKIVPEK  
PEEKVPVPIPKKLP  
PEVKPKVVPAPVPE  
RPIKPPGPPINPKLK  
PFVVPDAPKAPEVTT  
TQEGRQQVPAPQQK  
ARKALCDPLEEVREA  
LRLKQPNIPTVK  
KKPLKKKPTPVLLPQ  
VIRSLKRPPPADAPT  
PRKRTHAPSALSPPR  
KQDKLKSFPKFSDSA  
NGGISSPLTGKRQD  
IREATAAPHGKRKRK  
LLVNEQEPCKFLDA  
KTLGIKLPFLVMIK  
ESKKNELPDGLNKKR  
LKLYRLLPMRAAKRP  
ASQRCRDPPSNPVAA  
RRAHTANPLHRCRCG  
AVETEPEPELRQQTE  
VYDAYLAPNNLKPVV  
GLLYCDLPEPRKPLE  
CLDNTRKPVDEYKDC  
EFQLFSSPHGKDLLF  
FFSEGCAPGSKKDSS  
QNTGGKNPDPWAKNL  
KTPKYFKPGMPFDLM  
RNGQWSEPPKCLHPC  
EFLRACTPGASLRKG  
SHFRHGIPFFVKVRL  
ENVGTPCPVSAFPSS  
LSHKDDSPDLPKLKP  
DKGACLLPKIETMRE  
ARLSQKFPKAEFVEV  
KVPQVSTPTLVEVSR  
GTRCCTKPESERMPC

CVLHEKTPVSEKVTK  
ESLVNRRPCFSALTP  
VELLKHKPKATEEQL  
KRVIISAPSADAPMF

**P-type of 792 negative peptide samples**

LCGMLSLPWYSHSD  
SGGSYVYPPVQEFPL  
YIVPDYMPVVYDKLP  
TTAGATQPAAPTPTA  
QMANNFTPPSATPQG  
KGSETYSPNTAYGVD  
STNMGILPSVTMYNF  
GKSTDFAPIKEDFGQ  
HSWQEQAPNQPPGPT  
REKLKAKPLLLQLPI  
SSFIKRQPLVIARLA  
VLGEYYTPALKCEVN  
LRRVAGTPCGVFGQR  
ALEHEYEPYSRLKSD  
VIINQLQPFAEICND  
KSDDPVVPSLFKQKT  
SDFDFSAPKINLEIE  
VGGTIKSPKNNEKNF  
TGRQIFQPLHALRNA  
YLSTEDVPLARMLVP  
PEKEAKSPVKEEAKS  
SHGEKELPQWLREDE  
SPTASQAPNQQAAPT  
LEKQFVKPDGENRAR  
RFMEIESPHINENYI  
RSLWRLEPLRISWSG  
EEYIALYPYSSVEPG  
DALKSREPQAKPQLD  
AIIALFTPTTDPEAE  
SSALGEKPITFYRQA  
PIPKKLKPPPKVPE  
SLSSAGRPGPSEGGD  
RLCNDLPPGTVKLX  
AELEIANPPELQKHL  
NIVGIGKPSKVSECY  
RDIPAMLPAARLPTT  
VMTLKWTPNQLMNGS  
KPSKSTEPILIKDPI  
AELLANMPDPTQDEV

IKLNYALPPPLHQTE  
VQGLGVMPPKAGQTI  
ISQNESRPHFLIELF  
PLVDHTSPSSDLSLLF  
SSTVNGVPSRSPRLV  
TPEDQDLPPCPEDIA  
RCISSALPRRRPPVS  
SSISDHTPWLMPTI  
SLSHSACPTPNPLSR  
MVVCWGHPSDGGSE  
SESSFGKXXXXXXXXX  
RQFDNLKPSGGYITG  
TVLDANDPPIFTLNI  
SWSRISNPSAFSIVP  
SSIALGDPHIPTSPE  
FNQSLKSPSRLGCPG  
PLLASMPAQLPPRD  
IAQDPKQPPDPPVDV  
ECHISGYPSPTVTWY  
KASVVTLPVYLNFR  
NTSSDCRPSESELL  
WVKENKVPCLCNYK  
SWLKDGLPLKESEFV  
EEVDCMDPTCSGRGV  
AESPEVLPHIEKELS  
SCRSEGTPAWYMHGE  
VAFQLHLPLSQRACS  
DRFCLSSPTEALKMG  
QVRVVAQPSLPAVPQ  
WIRDALRPPLQNINS  
HKESFLAPVFTKDEQ  
AAVQKAIPMYKIATK  
WGMESKIPVEDNKRF  
AQNPVDAPGRPEVTD  
SEDSVQVPRNLVGKV  
YPDIGWNPCGGERYL  
IGSKAGVPSKSSGSA  
SLEPHQGPGTPESKK  
LWGCHSAPHGGLIY  
EIGDGFLPVCSLGPG  
GAETLTFPCDRWLAT  
LKASVCKPFLFLLKK  
ESGKIQEPFSAMSKS  
GTQVSQRPGAQALKV

KEQQKDSPVFCRFFH  
QSRPTGVPTPTSMLS  
EMFGVWEPLLEPLEI  
YTEVANIPVARPGRR  
SRLDLDLPGCQAEPP  
YLNKKGNPKKFAFLA  
AIESLVKPQAKKKAG  
ENIDGILPLHDAVAN  
GKLYIEAPTFDLQGS  
VQIKKMEPDEQLRND  
KRKKKKRPEDTAASA  
SERLQRAPLKSVPD  
DPRQLGVPVIARDIE  
ELLSTTHPANKASLT  
SVTVTTIPASQAMNP  
LSAHTILPGSKTREP  
ALKISVAPGLADQKT  
DRGEIIDPFVEVEII  
HKDLIKKPTISTAVG  
DRETILDPNLQATLX  
DGAVPAAPASADAAR  
VLAERKSPEISERIV  
SPHPPLQPLTGSAGQ  
FLPASTAPMQGKRKS  
LNNSSSSPQRSVDQR  
KNALENYPNFRSVVD  
ERLALAGPQLRPEMS  
LKSQTQHPWEKLLNL  
NANQNASPNVPGKRG  
SLEMGILPREIRKLV  
EATPTAAPPTLPPTT  
EKHTHHAPLSPRTFH  
QYRKVLMPLKAKPI  
ALSELVDPFKVKAGQ  
DAEVYNVPLDSQSDD  
DKLTLKIPWKNLYGE  
LSPTLNTPAPVAMPA  
TRSLGEEPVGGLGSL  
EEQVNSLPGSITKAG  
KVVIGFVPLAEIMGY  
TYIELMRPVSELIRS  
PDVEAHGPEWNLKMP  
YFPNRKFPSSSVAFK  
EGSRLSLPRLIDMSA

PRLTPVRPAAASPIV  
PQPGLVVPVPTVRPL  
LLVTAMGPPGGGRND  
KIEKELKPYGSSAIN  
ENLELTNPQEFSSW  
AVDKRFLPDDHGKNA  
PSAFSIVPRRAAKSS  
RLLSLSKPILPQQDN  
IKRQCVWPFIVMMDD  
ANLHPAKPKDFSAFI  
TQITTESPEKTLFSS  
SDCCGQKPTGPGGPL  
ACVTACEPPKTCQDG  
TMATRTSPRLAAQKL  
ALTALTPIQTAALQ  
KLQSILKPMMLRRLK  
RKKMNLKPIMRMNGN  
EKAFEGSPARELDVP  
GSSGAGVPGGAAAAS  
SKQKKVAPRPSIPVK  
LPGSVLSPPPPPLP  
GDSGGLIPGKSLVFA  
NKEEGARPGTLLGTF  
RRTEGQYPSICPRLE  
HEAIIKPEAIEMYI  
HPFASFHPGLNPLER  
PDGLKLYPTLVIRGT  
PQRPASEPHVVPKAV  
EIPKKKVPEERKPVP  
RLFNDSSPVVLEESW  
GDRSGIFPSNYVKPK  
QAIIQIPKASNRT  
EKRDYREPFRRKKDR  
FTNTSLHPQRMKALA  
PQFSSLQPPCFPPVQ  
ACRCSIFPDLSFVTF  
LMDYADLPYQIEDIF  
FIDDINMPVINEWGD  
GTLVLCLPQIKIISA  
ISTSEAAPYAPPSGL  
TPSWLGLPNNAERVL  
DLEDESTPIVKLGDA  
EDVVASLPLCHAALR  
RTHHTGERPFQCHSCG

GNLHLLSPGNSARLT  
EAIDVRPASTRFLP  
EMSDSNSPIPIYSQK  
DSVGVMSPPLSRSSV  
PRSVSRSPIRMSPAR  
NMVNGMGPMGTEGLF  
TNTSVLGPMGGGLTL  
TQGSEKCPQKTTRRD  
EESQHQPDDSNIA  
FAGTEIDPENEELML  
KVTIKDKPAVAPATK  
NHDESLLPESLESMM  
QHLPSVSPSVDAFL  
LNRDLSTPGLEKDSG  
CEELRAAPRQGPAPA  
PSKEEPSVKAEVAE  
NSSRQERPPVKPFIL  
GTEEKKKPSDFKKKV  
GGESSASPGEPQRTL  
QADRKILPFTSMRHQ  
RARTDEVPAGGSRSE  
RFEMEGLPVDES DSC  
LLSQLGQPSIFDTQK  
FDAEDGEPQTCKSMK  
AASLAELPLTPPPA  
ISDTLLPDLSQISP  
NRFTMEVPKKLTEWF  
TPESSLPVALQTPT  
ITESQSSPPPVIDLI  
PLLPSSEPPPAPPLD  
EMVSGFGPIYNYKDT  
VQVLKYEPFLDCALS  
LGRASVVPLPYERLL  
KKTGDNPN SHPEPA  
ARNLFSVPGAPDKPT  
AKVMELLPTHAFSTL  
HAVAWGTPGFLTVML  
TTSQDEAPREELAVQ  
SYQEAQLPALPESVP  
IVEREMAPDFELDAE  
ATLEEGNPTDEVPST  
LLKPEADPRPCERAP  
PKKVAKSPAKAKAVK  
SRRRPRAPKEKAQPL

IPMLYVVPRPGKAAF  
PMNPIPAPLPPDIPS  
GNDSDEEPPAAAPT  
DKVVIQDPYRLPGPP  
FAKSDNQPSTEKAME  
IAKEKRTPAPEPEPC  
SAKITSLPPPPPTLF  
LHLQRINPTTVKMKS  
LDIKAKAPKVKMPDV  
ESGDAPRPPPAATPP  
VDLHRFHPEPYGLED  
RRMQQAAPTDPLPP  
KAVSSADPRAPGESP  
TIELEWEPPAFNGGG  
XXMNTSIPYQQNPYN  
GALMTLGPSVVRYHL  
VTFKANRPFLVFIRE  
VKVAQRSPVDSGTL  
PMKPLLLQPEVLSP  
NLVLKRVSPVLIKK  
MDDLISPGKNKSGR  
PRESACLPEKLEKE  
RAWGCAGPCGRAVFL  
NWRQPELPEVIAMLG  
MDRDCRMPMGLSTGI  
TVENASKPDFTKNSQ  
RTDLYFMPLAGSKLA  
DRGLQLVPVWDIILS  
NALNSCDPWVQAKCY  
TNMGIIIPDFARSGV  
SKTIYTAPLDMLQVT  
RTPPRRMPPPPRHR  
XXXXXMHPPKTPSGA  
YYRQSEVPDSVYQHL  
EKDDSVRPNMTLKAM  
ECLGAAVPARLRKVA  
RSLQKDFPIQILSID  
VSDVAKPNQACIST  
SLKKAKKPLPPSRT  
EKFRIELDLGRFYK  
AARISTSPIRSVRSP  
AFPDGHLPEEALKVS  
ETYTEEDPEGAMSVV  
ALDDAEESPSPPPP

ECTTIEHPFCMYDAD  
GAAGSMSPSRVEANV  
EDVQVLIPFKGRPPP  
EKVSEVLPIQKNDEE  
LKFSSMAPDLDRLE  
HPQRPPSPHPPPHPS  
NRLCFLEPTSNAQNV  
TDEILLNPNNKWFKP  
GKLSNWEPKDDAMSE  
GSGTDMEPSLYRCSN  
FKSDGIIPFAHAIWH  
DMLKRVEPLRNELQK  
FGYIKIIPFYILNAT  
GESKQHIPEKKNEVH  
ATLSVLEPATIVEKP  
LQGGNKSPVTLTAYI  
DIIQVTVDPSPSTSE  
ALGNQSTPAPPTGEV  
FTNFMRSPACDIFNP  
PDVSMVDPEALAEQ  
TSLFSNKPFLKLGAV  
LLCGSDLPLHKMAIQ  
CTVLTLEPNSQVQQR  
YNGKLTGPAAVELKR  
GDASIAAPFTSKLSS  
IRDWLVKPIRDQHVK  
SQVFIDHPVHLKFNV  
AEDVSGMPALCSPIS  
NHARLRTPPPPLSHA  
LSHTLGDPIKIRAWQ  
FQELSQTGHTTEELA  
LGRPPSAPADKDGSK  
GFLSYLGPFNQIFRN  
ESQGEVQPNFSTSSE  
LMLTAGLPELTSVKD  
RPGPHSVPSQAPRLE  
ILDEFYGPEKSLQPI  
KIINFKTPEDARWIL  
DREDQEAPDSDAEVD  
KQNGIPHRGSTAIF  
AGQVAVLPEVQVTQN  
LAELLRGPCGSFDVR  
KAKKRRLPRGFPPSA  
LQRAFPAPAACQCHC

VTRQLYEPLVMQLIH  
EWFLRTPDPTSWYS  
NPKAITAPQMFGRLD  
KLNQHDSPRIKALEK  
MMLCSECPTVFVDAE  
ILKKYGIPFSRITQE  
EKTAAPSPSLLYKST  
AECWRSRPEERPTFE  
TLTYTAKPVGGIGGG  
VTSSQVQPVTIQQQV  
CQTSTVFPLKKKVS  
RTVKDSTPSSLSDP  
QVTDANDPPAFHPQS  
LADTDLSPMDGISTC  
EADASGLPHKLGEED  
KKIIEQPQPSGKQE  
DCFSEEAPDATKHKL  
SGQRSASPSVPGPTK  
KTVKLKSPVLSNTTT  
QKSLSLSPGKXXXXX  
FVASGMGPSASSHGS  
LGCTAATPPSKDPRQ  
QWIRNLVPEFGVSSS  
MRKFLSDPQVHTVLV  
DRSLESNPEQLQAMR  
VASSEAKPAATIRIV  
DLQVRACPFLPVKRRK  
ESVHGTAPDIAGKDM  
XXXXXMVPGEENQLV  
FLRMSKVPTDLAVEE  
DFLKRRLPKLSKSTA  
QECKTKHPHLSLKE  
VLKFSCKPGFTIVGP  
RLEVELYPSEVVEIQ  
TTKSSAVPPGLPVYL  
QLYDDSFMEIRQYL  
KKDTKKYPESTDTES  
SHGDVIRPLRKQVEL  
ESGLMGEPQPQGPPS  
GHETEEFPDEEQLRR  
GDSRGPSPSYLGPR  
ESRYQTLPRGLSGS  
DNANSRLPEDTTSVL  
KAAYLSDPRAPPCEY

IGFLDNWPLLEQWFS  
LFQKKIDPVTMDPEK  
SVAQTGGPPEADGLV  
EMEVCKLPRLSLNGV  
SVQSSHFPSPGSYSVR  
ITEVWGIPSPIDTVF  
SAQDMHVPVPKQLAH  
SKDIPLSPPAQKNDP  
YRGVKVMPFSTACNT  
YQEKLYRPPVLDAL  
PAGPTESPASKGVTA  
WVRCNKMPVKDITYR  
EKECAPTPAPVTRAK  
RHAVKGDQPSPGRHW  
TASLLAIPHTPESSS  
VEAFFYEPYQGAIQG  
FMAVKNWPWMRLFFK  
ENYVQETPLVLSRCS  
MTISWHEPLSDGGSP  
SAEKNQRPRKQTSAP  
FAASSTVPHCEQSCR  
VATPQVSPNTVKRAG  
EEDLLDDPSLEGMCG  
ASYESES PENQTEKE  
WQMWTLLPGFCTRPT  
RQLDRLLPKLARGSL  
GKKVRKMPVSYLGSK  
ICHEISEPRLQNYDE  
IVDVLDVPGPVGTPF  
KKSRLFWE PNKVSSNS  
QRF CIGHPTQEMTFG  
RARSLKFPGLISGCT  
LIKEQLEPPEIDMKN  
HSDSGYEPSFGKSSR  
GLAWARAPQPKAWVS  
ASSVETKPGASKVAT  
LIRCSKPVVLPKGP  
AKKEDKTPIKKEEKP  
GKASIKDPHFLNFNK  
MTMMSHIPSVMKAHG  
ISELTGTPFDVESDS  
DYALLTLPAEFSSQL  
GATAPPAPAEPTPPP  
EIYGKWSPLILNPSY

EGKSLRFPLALEEKQ  
NRFGVSKPLESAPII  
PQLSVCNPHSGKEYF  
SNRKGETPLKVANSP  
YGIWKLIPNGQYEFR  
GGAEERPGTPELAP  
APLNVVPPEVPSEEL  
ELVQAMFPKLNNQER  
GTELSLNPTCAVFIT  
KVFEAKPNSELCKK  
VTSAISLPNIRKPDG  
CDEDHQTPRDGETSH  
VNYCECNPCFNNGSC  
AFYQQTLPNSHLTEE  
VYIESRRPNTPYFIC  
YLAQQIHPVVARICE  
VEDKSDPPEGSEEAA  
XXXMTAEPMSKLN  
KSVHLQKPKPKKKF  
ADSVLLPAAPEGSR  
GCEGSSKPFYNRQD  
RRREQRDPTVHDDVL  
LDGEEEEPEEETTLG  
SGIRAGYPLSERQQV  
MKRESQNPDKDET  
NKVGASDPSSDPQ  
MKVVTLKPTVLEHTV  
ITPKSDVPIQAPHFK  
ENLKIDRPEDAGEKE  
ISDHSETPNMELSCR  
SCSENQEPGYCTVSN  
SFIKQNNPKFSAVQD  
PEDDGGSPITNYVIE  
TLVSGSLPFDGQNLK  
LARYSYNPFEGPNEN  
PASTRFLPQGTRIAA  
LHEIYFLPDHPELKK  
LNDRMTFPEELDMST  
GRIFVFEPGPKAN  
QSKLYHLPPTVGPH  
IKNSNGIPKLKYIPL  
FLEVDEYPEHIKNLV  
QETAEGIPPGSQDSS  
XXXXMSEPGGGGED

VYCLALVPANTLPKT  
RCFLEADPYIDIDQN  
ASLEVEVPAKIHLPK  
KKVPAPVPKKEKVPP  
QVFKPFLPSIIALCM  
YSVYGTEPYIRLGVL  
MSPARMSPARMSPGR  
PVPEEKEPASSPWAS  
KKTfVGEpQRLGSET  
KDMVKMFPLLVEKLR  
LGAMSAAPSQPNSQI  
TDRLVITPLTDRCYI  
SLRQNETPQAAQRS  
LSKDLLKPIQDVNSL  
TASPSSRPVASPGAI  
KSQVRDYPKHNGQIS  
GKDVLRLPSSITTD  
GLETYLGPLQVAYRE  
REYQEYNPYEVLNLD  
RVELLHNPAFCSLAT  
SVVSITGPLIRILGD  
PEQNQDMPPHLPTAS  
RLTPIGDPTMVVEWL  
TCRDEYAPPKAELDA  
GDEDIKIPENPLEPL  
GEIRSVRPLDREKVS  
LSPPPTEPTDGEQAG  
KKELKVGPYANTTRY  
GKDELSKPSSDAESR  
ATLVDQSPESLKRKS  
KLKVLDKPGPPASVK  
CTDSMGVPRALGETW  
ANGDSGDGPSYMSSLS  
LGRVFIHPESPSTGH  
SLKTAHSPNVFLQQG  
DKIQQMNPPEFEMIE  
ALLKDQQPGTFLLRF  
AVG TSAAPVPSDNHX  
EVKISHFPAADLGFS  
CVDGCYCPNGLIFED  
EGVLLTLPRQSGGSG  
ESMENS CPQVTEVTA  
SSSGAVDPSVQRSFT  
XXMMAQFPTAMNGGP

EEVRVRSPTRSPSVK  
CLEENERPLEDQLEN  
SSSSGISPDNRDFYQ  
ATSTSSEPLSSNQPA  
TTCNCKKPDDDTRKG  
MLTGESVPQMKEPIE  
VPGGSVKPKIMSPEK  
ILTTLQEPHDKHLLD  
TNVEDVCPNIPSLEK  
RLEYLEGPTVTSSYR  
QSPTKAKPKVEDEAP  
PPPSTQAPSVNGVCT  
HGDACFLPEECPCTW  
EVSIGSAPLAKQQSY  
NILVELDPDGCPWL  
DDTERRSPTPERTRP  
GSFGYKKPPPATGTA  
XXXXXMAPVHGDDSL  
APQQEELPLSSDMVE  
KKLRSDEPLIDPKPV  
AFTRTVSPGSVSPIH  
QLSELADPLKDELNL  
TPNPLERPIKMGWLK  
FKELFQTPGHTEELV  
EASKEYSPCVAPCGR  
KSFATGRPCKTKKRS  
HPYVTHIPSPTLPGS  
DAWLQTDPEIQSPF  
SEIKISNPTEFQNHE  
HNIENASPATVSRMG  
SLESSSFPLPKQYLD  
TGQLGVKPQTGNSIP  
CSPLMADPLLAGDAF  
FVYKDIKPRKRKKH  
TSANEVSPVSSSGVT  
FQRSRSEPSDAPES  
ADSDGWTPLHCAASC  
VEENNASPHFEPDLH  
NQIGCLTPELSELKK  
ETQAEDHPPRLYGCS  
FKISFGTPAPGFSSM  
GVCTDGEPQPLLGQ  
LSPDSHYPLEEEKTD  
SPISQRLPPKVESLE

AAEFISKPNLEILE  
NKCLIKNPAERADLK  
ELVAAVWPYRRLALL  
RQTVAQMPPQLVELP  
NPALTLWPMFLQGKD  
QDIAKDFPRGEESLE  
VTLKWAKPEYTGDFK  
QHVFSAGPVSDEVLP  
LYPPGRSPLHHAQQL  
HLSSKWLSPSPGVA  
QLAPDPGPAGHTLFQ  
GLCAALEPILSAKTK  
PADVTGLPMPKIEWS  
QKFRFNHPAEAAVLR  
SAMEMNEPQAPAPSL  
FHKVKALPLVSWRR  
AFKRANDPVNYLESK  
VRATRASPDPRAYVP  
KVIKMEEPLPAKVTE  
QQVTAEIPVDLNTRE  
GKVIGEFPGVVHCLD  
MIKKQDQPTFDNSGN  
SASDGYCPREHMLPC  
LKHSPEDPEKYSCFA  
LIKHHLLPLWNDGCI  
SSSLGKKPSLTSESS  
GILKRRYPNSLPALI  
SKRQLQTPKEKAQAL  
VYVDYPGPASLTQIY  
AEEDLTDVRCNSLE  
NSAGRSAPRESRPVI  
FQEFKRPDHKQDFV  
QAESQVEPSYSEQAD  
LTAKQKLPSYILENN  
RSTEGIVPQYDGSSS  
LSLSLAQPLRSERSG  
EMKEIERPFETYKEN  
NATSAFGPNLRYIVK  
VDQKIEHPLQPQGL  
HRR TSAIPRAFRER  
GDFKVTTTPTSTTQH  
VISRTGVPQPTQAQS  
RGKKAKNPKEEKKPK  
YTLKKDVPDGVKELS

GNNDVKQPEGTG MID  
VESEIKVPDVELKSA  
KLGVQVRPENWCSQM  
SWLKDDEPLYIGNRM  
PAYDGGSPIIGYLVE  
LAKILQNPITHSLQV  
KLSSQALPSFGYIKI  
PPARQLGPRSPRVGR  
SKVWYNCPXXXXXXXX  
GKDFERKPLEMNDP  
GQAVTLLPFFTSLTG  
KLAHGQEPWTTDAKI  
PGGKEEAPEPPDGGD  
QMHSTSDPSHRSSSP  
LKNKGIQPLLDVAVTM  
SNIDIRIPTGQLTMI  
CDEHFETPSGSYWDH  
IDKNTKIPCKSPPE  
NAWERRAPLAPKHIK  
TDWEKTKPVTGNLRP  
CYHFGLSPDLPICKE  
EALVIREPITVPERP  
GDMGDTTPAEPPTPE  
FVRPDLGPKMYNAYG  
DQKYRQHPSNFQFKK  
QMSFSQSPFLSIKAS  
FSALRALPDMEVVGL  
TSPEGVAPTSGHDRR  
GSHVNQGPHLGGIY  
GRITDVIPSEAINEL  
VAEYEVTPDDKRKAC  
LVRDPLSPAVRQKET  
GNICVYCPGGPDSDF  
RLLERYIPKHQKCLT  
PLTTALNPPVTATEE  
FLTYHWPPLTFLSPS  
GHGIMEEPELTLIST  
KLDSEAWPGVLD SER  
LRISLTHPTIPFNL M  
ENSIEGTPSKCYCRL  
NESKKTAPRQEAI PD  
INPSTSLPLIGSPPV  
QHRTFIKPKLEGLP  
RVRVVGKPDPECEWY

LQALDLLPLLIQTVE  
WAQQIHSPLTCEQLT  
ITVITLGPPSKPKGP  
AWDSGQGPRLPSSVA  
STIGLNQPSTPTHAA  
GEYDVTMPKVESEIK  
FKTSIFSPMKKEVKT  
DEREFSGPSTPTGTL  
GDEGADEPRGAGRKA  
STSKNTSPMRNSFAH  
LRPHVFMPEVTPDMD  
VDLSLGSPKLKGDIK  
LLVGAKSPNLPEHIL  
ILDGLYGPIAFKDFI  
ARHRCQTPHLLAAXX  
AAAARTEPYCAICTL  
LFHILVTPLFLLSTV  
AQILILEPPYFVKQL  
PPPGQLDPEDQDSEE  
CLVKDYFPEPVTVSW  
TPELSAETPKALEN  
TAALAVAPGPRFLVT  
GRPAEPQPEPEEPAE  
DLRTDAIPIRAAKAA  
AGIAAIGPAKELEAE  
EEITDNYPQAIVYPF  
APPGLQPPAEDEARA  
LVIPPQPPTTGPPRK  
SRGTDGQPLLLPYKP  
KVDALHCPPAAVVTV  
TMKMRILPDQFSPLN  
QVTTVKVPMMKRLGM  
KKACMFEPLPIKLSK  
RQQNTRDPDTMVPLT  
EEALKVSPVSIPAEQ  
IWWANKDPLPPLDPQ  
ELKLSSESPEPGRSPE  
MMGLDLQDLCSLLI  
TRLFVKEPAAFLKRL  
FDMHKRSPLLRAPRF  
ALGRTYHPKCFVCSL  
QESARAVPEKSTAPL  
VVLCNLKPQKMRGVE  
DASSSWGPMQMSASVH

AGVSSGAPPGRNSFY  
PSASERLPDEKVELF  
TVSQFTLPKSVSDGI  
TNSKATTPKPQKPTK  
KESKVEEPRKRETVS  
ALSSVGS PKAKEALN  
EGQTQRQPGSPMYRR  
KKPKTVKPKKVAKSP  
AAVRGSEPISVTWMK  
QFPFADTPDTYKSEA  
LAQADKLPMTDKRVA  
XXXXXMDPPRPALLA  
PEVRSTEPVAPPEQL  
EDEAPPRPPLPELYS  
EKPVDP PPFMFKPVK  
IQTDVVLPSCKKKAP  
ALSLFTVPEDCPIGQ  
SQPRDGWPMMLRIPE  
EGGGRSLPRSSLEHG  
TLSISVQPGEGNAAA  
TKSNDTLPSSHREIP  
ASAEGREPS PQCGGS  
SGGEWKGPQVSSALN  
YTIIQQMPRGNHFTI  
PGQHLLAPEDVISCC  
SLCVNEVPSFYVPMV  
KGVTSILPVLREGVL  
EQAQFTPLADPPDI  
IPLLLPTPEEKPPP  
PPTLSRTPEVQSRVP  
TDQKDSKPPEKATED  
EAMGLGTPSEAIEIT  
IKT LSDVPAPRRLAE  
TLLELLPWALLINE  
RIEGERPDRAKGYD  
WARVTKDPIHPYTKF  
KLLVNFDPKILEVVR  
ESKQATTPASRKSSK  
LVKMKFLPVDDNFSL  
NIETSNFPKLLLALF  
HLDLFLKQPLATQKDL  
LNKLSMKPEPLFRSV  
KDKIH TTPDTPEIRQ  
DAAHGYS PRAIDMSN

KTKEKAQPLEDLAGL  
ECQITGTPKIRVSWY  
FGTLEVMPQNESETQ  
ESEKSDFPPTPVAEV  
FVNKADFPKVRRAKEQ  
SGQLVVIPSDHLPFH  
ATGRPWLPLHTLSVS  
ADLGVSGPKVDIDVP  
WKQVHNYPMFNLLMD  
PPCLQQNPGTMQGVY  
GSAGPVHPLVDPLTA  
AHLFSWIPLSASITP  
LKWNFTTPRDEYIEQ  
VKKTDSQPTSVMLLD  
EGCANRLPNGHVNF  
RGGKKFLPVLKEILD  
STCSSTFPEELSPPS  
RSKLEDDPLYTSYSS  
SVVSQRFQNSIGAV  
SLLALGSPMYSIITP  
ASKGEMSPMVVETLK  
HCLSFTIPRLPSSEE  
IDKTCLSPTPTLEQH  
TIFQERDPANIKWGD  
NTDGLFFPVMSFSAG  
KADIGCTPGSGKNYA  
MTSTSLSPQGISTLE  
KTVGVWSPSPPTCER  
PRERSMWPLRKCPWK  
VDYASKIPAQGGTNI  
NRLCFLEPTSEAKKI  
ETERCLQPLQMMALH  
AVRMKIRPLVGQXXX  
TLVVKGDPRDNRQPA  
LLRRIEHPTAGNIEA  
HVLLTLKPYYAKPYE  
DEEVLTDPKIQALLL  
LISDTKAPKRQEMES  
SSVTFEYPSNAVEDV  
TSSWLVTPKSLGNVN  
KVYDRYIPDLVCVN  
CWYSQWTPAAPQCKA  
SNGYKPAPLDLSDVK  
LGVAEGSPQYKKWYF

IATKQLQPLLNKDSP  
DTWVEHWPEAEQCQD  
GYLAATYPAVGQTSP  
GGEFEMMPLGVNKSP  
LSAEAACPMFNFSIR  
YLCSAVLPLLTRCAP  
MDVSLHLPSRSSPTV  
TIEELKEPEKNGIST  
AIDRFNAPGAQQFCF  
GGFQVLLPLVDQYFT  
ILLTDGEPTVGETNP  
KMLSGFIPLKPTVKK  
EELTYSVPYGREKDV  
SLKFKEKPTDLETRS  
DLGQGLMPVLEAWKA  
SRLANRAPEPPPQV  
RTKKEGIPDARQATR  
GCKEICCPVDPKSV  
FSHIDVSPGSAQVKA  
IILLILCPEIIQDIS  
KAHIQFKPTLSQQRK  
MGNCGHKPESPEVE  
EKASKEAPVKGLLQT  
LKNLLFNPSKPF SRG  
RGGKGISPPSFSSYL  
SRTQWEKPQVKESKR  
NSALDWWPKIDAVYC  
GVQREDVPAADLSDQ  
YRDRSFSPGSYERET  
KVNSGAFPAPIEKSI  
AIMRYGMPPQDAFTT  
KEVKSTAPEATVECA  
SEGNIDSPVSRFMDR  
TLGEKAKPALDDLQ  
GAAFSQKQSNALIG  
SNQAELLPSKSVSLI  
LRNDKDKPLPPLLAR  
EKSLSHSPGKXXXXX  
GYYCLKVPLLVFKRE  
FYQEVANPLLSSVTF  
ALLESSLPDTDPVVS  
EKCLAGQPKDTMRLD  
GTSKAGNPIFYVAR  
YSRIKYDPDLFRMAL

TQKTVDGSPGKLWRD  
EAERSGIPIVTSFYQ  
TNLKIKHPTYCYEMN  
YAAFNNRPPSTWLTA  
ICLAQNSPSTFHYVL

**R-type of carbonylation peptide fragments**

**R-type of 136 positive peptide samples**

ASKLSKIRVVRKSIA  
IIIQSYRMHVQQKK  
HCKAFKIRKHYLHLR  
IHLELRNRTPAAVRE  
LEELDRERCFLLEI  
YEMHKMTRDPLNLAL  
RPPVSGLRRRKPRAT  
KTQRSPVRIPFMQRP  
KQFFKDWRDKDQSDG  
KSEYKSYRLRAQLYK  
KSRDEGPRLGDAKLK  
SLRKLPPRSEISSEK  
RKSTEFPRKIREQEP  
GSVTGKRLRCMPAP  
ELQDMAARQQQIEN  
RKLANAPRPLKKRSS  
ASSRAHRRHRRQAVF  
RALLTAPRSLRRSSC  
TMLLPLRRFPEQVR  
SIDSLKQRLNVAVKE  
EADDEEKERILAQLRE  
VADLEKQRDCSQDLL  
EEEEILRLHQQKEQ  
IELLRKVREQVLKCP  
LLAEVERRIRRGHAR  
PDGENRARFLPGKDL  
WERKQNLRPMPKKYH  
RVLSGRWRLPLRALP  
VSWGKLRVKGWAP  
TLPKRVPRAGEARNL  
EGGHFKLRVTISSNN  
TLVEKEMRVTLAKLL  
GDSRLKMRAELGEYI  
REQEPTERPLKGIQS  
ALAKHKERKMAVPMP  
KDLGLHPRAVSTSF  
CLEVVLCRVEGMTEL

IKGLTYLREKHKIMH  
MQKLNQKRAELKLVV  
RIPQLWKRVSWDSST  
GYKRKVMRMLKRQVS  
ALVPPWTRVYRVQRD  
KCSEETFRFELGGGV  
GAGSGLGRLLALQFA  
SQDKMEIRSCLPKLL  
VDKSGVVRVRVEGDN  
KERLQEVDRDKLGLQY  
YVGKAATRLSILSLL  
RSVFTVMRRQLLEQA  
QRGLTEKREELLSVP  
RKQLIPRHTKTREK  
LLEAEKERNNKLSLQ  
STEPLPGRKQVRDTL  
RQLAIETRKTAAQT  
LSHPKIPRCQERLLR  
RDRPGDPRRKRSSDG  
FKDMDMKRLSMEIEK  
LKRSLEMRERVLGPD  
DRGHEELRKLESTLD  
SGILRQLRQTVEATN  
TAEDLRTRKSKLQEL  
KAAAADGRGMLPKRA  
PPSAASSRYSMRNRI  
SRSYTRSRLASSHS  
HIAQKLFRDGHFNPE  
ETSLNKAREHSLRS  
HVTKTRRRCKTVRVD  
RLSSVFLRVRTNVGV  
GQDGSRRGPQKRGV  
PRVFPPRRPHTPAER  
APYVTLRRGLNAESS  
TSQGKLLRTILFGVK  
IYKPKRGRPKSKEMP  
ENELTFLRSQIAAIV  
IANVFQNRDYQCDTV  
LMEFITSRKRGLWN  
VVRPKDRRVGTSPQG  
RRSVMKRPSSVKSL  
PKTMPRVRKPKTTPT  
HFHTVIARRAGMAAS  
RIKNPKARVTEVMKA

LFTQELARRLKSGV  
WDATEDLRISRTDSF  
ELIRLTQRLRFHKVK  
LPLVSWRRLEFQGE  
FLQVETRRAGERLGW  
LSYRSLRRRVRRLRR  
VGLGLPNRLRFFRQS  
GLAARLQRQFVVRAW  
SLRKGIPRTKSVGED  
ETRQRLLRVTKKEVK  
AIVRQRERESHAAAL  
ASPWKSARLMVHTVA  
LGKRADQRKAKLGDS  
IKSMAASRRAKLNES  
QRMKALARALPLQPR  
SASKASVRSISVEDK  
EEELLNVRRELMVSF  
AQLNIKERLIPPSFT  
SDPIKACRPIKPPGP  
HHVVSGLRENSYFF  
VVESVLRRAKEVTWY  
LKRTKKPRPPSLKKK  
KESLLQDRRQEEDQR  
QEERLEQRLKREEVE  
PEKENAVRDNKVYCK  
EKLHLITRNLQEVLG  
HGKQPSLRAAKEHAM  
NCILDDKRPHVKKAT  
NRRTLLVRPISKQDP  
QADNPLGRSVLRKDI  
GPPTGAGRGPSQLQA  
KVLKNNIRFMNHMKH  
SRLSRHRAVHGPPE  
LAPLNDTRVVHAAKA  
YCDLPEPRKPLEKAV  
CALSHHERLKCDEWS  
VKVPMMKRLGMFNIQ  
YQLEGNKRITCRNGQ  
HKSEVAHRFKDLGEE  
LPKLDELREDEGKASS  
SLQKFGERAFKAWAV  
EKTPVSDRVTKCCTE  
CTLSEKERQIKKQTA  
PLPKEPPRKDPPPKD

XXXXXXERIDGGITG  
RGGEGNARTHGTPDL  
VLGNDGHREVVKEVV  
RGADYSLRAVRMKIR  
QQARLHERGAAEMVL  
LPKIETMREKVLTS  
CTKPESERMPCTEDY  
YLSLILNRLCVLHEK  
TESLVNRRPCFSALT  
VGVNGFGRIGRLVTR  
AITIFQERDPANIKW

**R-type of 847 negative peptide samples**

VTPHTQCRLKLLKLE  
VLSFSETRAHQVVQQ  
ELSKANSRFATTFYQ  
EEAAGSDRASDLDSV  
GSNGVDHRSYRIIRG  
HSGASQHRIARPSRQ  
DSSLGKNRKALAKGL  
IVDEVHERDVNTDFL  
SDVEAHFRAAHENTK  
ELFVKGVREVDYYC  
HASCYGIRPELVNEG  
ASPATVSRMGMVYIS  
RVQRLGERVVDSGRS  
RSLSRFERSARFDIF  
PNTYDIHRLEKILKA  
EKPGGKERGSSASHP  
VTEASPWRATNPFLN  
KKKKKKGRMKKEDNI  
GEPKDVIRKDVRAIL  
PHQLLQRLQEEKDR  
LSLSHFCSRPFCLFG  
TTEAPVKRASLLGDM  
QEECGYLRRHHQEEV  
VSNTLESRLDLIAQQ  
KKKMTKARLERFKLR  
VYTTKSPRERAILGL  
PASPISQRLPPKVES  
GAQMEARPLVQENP  
TKDNEHKRSLTKTPA  
LHVTDAGRKHIAIAW  
INYVLESRLIGTEKF  
SSASLIWRSEAEASV

KFTTEEKRFVESRDV  
EGEQYLFIRIAQNEK  
PPIYTAAREQTPFRH  
IRGNEAGRFRLDITL  
EWDKDVARKLGSTTV  
TDDSGTYRAVCTNYK  
ESKGPMTTRLLLHEV  
LDLKETLRLRILSED  
DELLRHRDEQKPAT  
ALNMLTWRAEQEGGM  
PSSGLKKRPISRLQT  
CVIQSYWRMRQDRVR  
DVWIDVQRRWVYLEG  
WLLAHCGRPQTECRH  
AACVMPSRLKALGTL  
HKQTKKRRILIPSDI  
SIQDWAKRMKALVEQ  
QENCILLRLDNELGG  
SQFNLSGRNPQKQAR  
KSMSIVLRENHQKPE  
LPEEIALRASDGPQL  
EIEKLEFRVRELEQA  
EKQVELYRNGQRLLE  
AKKPAATR KSSKNPK  
EGQEYSFRVRAVNKA  
SISGCKMRLSYLSSR  
RFRTLMMRRRFLSLK  
TYDSYYSRSRSRSRS  
EKETLLQRLTEVEQE  
HWGQQQIRPIKSVIP  
AVPPAKGRTVLEEKV  
DLSTIQERMEELKGQ  
SECGFCLRQFPRSLL  
TPSEAHSRIFESVTL  
RIQVFLARYSYNPFE  
KREKEVARKLEFDGL  
PLKTDIPRHPMPFAA  
CYIFPGGRGDSALFA  
RDMEKVERQAVPQAN  
LDLDSSELRKGIVVRA  
SNQSVLHRWERKQNL  
ECSKTSFRVANLEEG  
MSTIEPHRQVAWKRA  
YKDKRELRS GKKYKI

LEAQVLPRFQPRVLQ  
SPQPPLSRAEAIKQV  
ELEAHLCRMMKHSM  
EKKLEDARARCEGQE  
TYSSAEERMQSEQIR  
GLELSIDRFRLRKK  
SEIRITHRSHHFIPR  
CSKDELERALHYLKN  
HFIPTIGRLRKRAGK  
KQLPQVPRPLQLFSA  
CEPLSNKRNSNSVTN  
HVHEASSRSHAIFTI  
KNPASSKRRLKTSLG  
GPKLEALRAEVSKLE  
WICKCVRCKSCGST  
NCVSGQERGRLGVLA  
KLNETMERQRTEIAR  
NYSESLYRQAMEEAK  
LAMLAKERLQEVDRK  
EEKQEEERSKVDDL  
SEPGANMRHIRKPM  
HVEAVYSRRCVSFIL  
QNQVGIGRPAELKEA  
IHYLMLPRVREELID  
YGLITHQRIHTGEKP  
TGLETPDRKGGGTTE  
KVPPSMRRIRAQKG  
RRELLELRRKGREEK  
PLGLILNRFSADTNI  
GNLSILSRQESSFFT  
IQGKDVLRLLPSSIT  
LNTSIDLRITNVLND  
EKTINQQRIHARIGQ  
KAKEQETRISEEITK  
VLIPFKGRPPPTVTW  
MALEETLRQYQAAS  
PGFKGEGREVDVNL  
RDLLLQTRLVNHVSS  
DNKKKKQRTSSKKKA  
WDDIITNRCFFLSKI  
RKTRSARRRTTQIIN  
YIRISPTRAYNRPTL  
LEEELPKRVRSLSL  
QLKSFPARLRQYASY

STGLLPGRGPGTSAP  
VKAGDSSRLECKIAG  
ATEISTERDLGQCDR  
CREVGLQRRSVQLFC  
EFKQKLCRAEQAFQA  
KVNGCLGRNCKLPIT  
HQAAAATREASSESD  
GAQMLAMRGEQLGVV  
TEGMDDFRYACQSPE  
IKKANMKRENKAYSF  
FSCQRRTRFISLGEA  
NSIEASLRCSVVPR  
ALTDEESRKNWEEFG  
EEKPEEERSAEESKP  
SQELDVKRREAIYND  
EKKSCKIRDKTSKKK  
DVFLDSGRKTRSARR  
KIDHELHRLQALLKH  
LCPEGVHRFQWIRNL  
QDQKVNIRVAVLPCS  
GATTSTIRSSCLVGC  
APMTPAARPEDEYAA  
KNLVQKERELEEQEK  
QFGGIDQRKIFTFAE  
QERDRKFRLEEQKVR  
VVLPLDERAFEKTLT  
ALAVEGKRIGKVLDH  
EFLELKYRLLSLLVL  
AKWFKDGRELSADSK  
RVRPLSKRETKEGGR  
IDVNVIARPSAPKEL  
EAYITATRQYVAQAN  
AQSEAAGRTEPTGPK  
CYFHSGPRGTHDLWD  
VNLVSVGRVLWQWTK  
ALHTEITRNKDSTLE  
LQVNDHVRKVTDQIS  
VTLQSAYRGMKVRKR  
IVTEEHLRRAIGNIE  
CPGMMLWRYPEPRVL  
EDVHIKGRIIDTVAQ  
ELVPPSFRGGKQIDS  
KLQTAIHRVTLAQTA  
VHSPDIYRVVVEGER

DIANVMQRLQDEQEI  
KFVGDATRLTDKILLE  
GLTNPSLRSPEESTE  
KGNEIVLRQDIMPTT  
RSRSGKGRGLPKKGG  
SGAGCSSRDPGPPEP  
LEKIKAKRSDSGKYC  
KFSSKYLRTEHGSEM  
SKSIEKKRGRPPTFP  
RKVFSPIRSEPRSPS  
WYNVENWRTAVTSPD  
HRLIAKSRELYEKTE  
GLLFYSLRLLTMAP  
ESDSFCLRNIMEAPL  
VKEVAWRERYEDSQ  
KLGKVNDRWQHLLDL  
LGYWLEKREVNSTHW  
ERDYLLERRDLAVDF  
IIDEGLKRFIIEITF  
AEAahnQRAGAPGIQ  
TSVPTTPRATPILQP  
PLDQTLPRQGPQSL  
IKALADEREAVQKKT  
LINGGSEKSCFWKL  
VADLGNIRIRFIRKN  
AKISDLHRESVDHLT  
EDVTFNKRKMKLEED  
KKQQQCRPSISISS  
PKVLQDYRKLKNTAE  
IKKLEPSRIVKQDEF  
GKPKVLARTKGSMLV  
AWIPVPARREAEKVP  
SLDWLISRLEAS  
RLKAQEHRAEMEEKG  
DEAKTSARDAALAYH  
PTTRSSARRSQAGVS  
LYYYNFTRTVISSGG  
DTQTIWARTGYLGFL  
NELAYFKRENQELMI  
ETQIDETRMGYKPVA  
ALFPKGSRSVVPRDT  
EVFTYSVRGLYENHK  
PRARPRERDPGRRPH  
NAALDNLKVVPCYS

ESTSQIERPLSQEPA  
YDGPKNVRSDISDQE  
PFTPVPPRGEPVTVY  
MKKFEESSRAELEKVL  
GTIDGEVRLTGELDR  
SETKDPLRVQPHLKK  
LMVHVDKRITLAAFK  
FFAKLNCRLYRKANK  
QKVAEQERTAQQLRA  
SEILSNIRSCRLQCF  
PLPTVNERDTENHTS  
EQEQLYLRSGVVSSA  
AVVDVSDRAVPPSFT  
LEYCEVQRDPYSNYG  
EDISKLNRAAKVVQE  
QGETNKNRTKGGWQQ  
EFITSRKRGPLWNHE  
DMSMLEERIKRSAKR  
AKQFRAVRTTEGEEE  
VKERESERNQCNFKP  
DKINKTYRSQLSSEE  
EGVKYQFRAMAINAA  
GPPASNLRKQKSLTN  
DVLLGASRTLALD  
EEVMHTPRTSPSCSAD  
PGLPVEVRGSNGAFY  
PGSTVLYRIFTVNHK  
AQGALPERDASRGGL  
PVWAAKQRVLCALNH  
LEKRQMDRAEHKGEL  
ITESDAQRTMYPGSC  
ETPSYAKRRRLAGPS  
EDEVQFLRTDDEVVL  
AVVLTSYRSTAERKL  
RSEGEKVRVGDDLIL  
LHNSLLQRKSKLQSL  
GWWVRNTRILRKCIE  
LLANAPERVVERRRR  
RNGPAQTRVSSSSSH  
SVQLTEKRMDKVGKY  
EDTWKLGRNWGQSVE  
SWIWWQLRTGLARDG  
HCFHMCDRMVIYFFI  
STPSLTSRKIHGLSH

QSVAKMFRAVEEGLT  
LSVKDAVRVDSGNYI  
KIYNIEDRTRVPNKF  
DADLEALRRKLANAP  
NFLASKHRQPPEYNP  
CEPNCYSRVINIDGQ  
PPEPVDKRAKAPKAR  
NKPIPALRVVEEKKK  
SKLLKNWRDLARIT  
IRNGVTKRGETLSWL  
YTMESTDRNQTFEKE  
CNGQNTLRNIVHLSK  
LPIDLYRYDDVSGK  
LRGLLRSGAWEQQI  
EDELQLPRLPELFET  
FKHIKDTRYMSSYFK  
QRAAAMARTKVEIAN  
QNSSVLDRLPQPAES  
TSKSSDNRETNRNHS  
KDTLMISRTPEVTCV  
QLKNLKIRTNRIQRF  
HQWIQETRTRYLLDGS  
QALLSKMRAIDLQIK  
KKTWAKVRTAKFFIL  
MSFKDAERGDTSCE  
VEEIMYLRQIYKQQL  
TTAATVQRPGPGQTG  
VGLWSMCRNTRGTVG  
XXXXMSARTPLPTVN  
PHPSPEARAPLASAS  
DTPPSALRGSQSVSL  
HCSLDALREFFSTIV  
STSYMHRSPGGPTK  
LLIQKYYRAYSIGRE  
ESEDNHRSSDFFE  
ARFDIFSRYESMCAA  
TNYILEKRETMSKRW  
KAPSESARGPPGPTD  
RKKKSKDRPSKLEKK  
KVELSQLRVAKVTGG  
VTSQFTTRDDILRDW  
GHDEDNTRISSAGCL  
SGSFVSSRARREKKS  
HLFYKIHRNRYPVCT

GLCIFFVRCRNDVAI  
SLEKNLDRMKLDWVN  
MTCLSIDRFIAVVHP  
AETVPEERARGDPDS  
NEHCPSKRDPKLYK  
LQQEQLRALQGRQA  
RLPTLPKRVPAGEA  
PDSMFGDRGEIIDPF  
EGQEYEREDEGYDEG  
EVNAAWQRLKGLALQ  
TFQTLEPRASDAKNQ  
FLALILQRTFLQASY  
EHQMYEFRVKAVNEI  
QVWETWPRAQELCPE  
IVNLLKMRQGEEVFQ  
QIHMQRRDAMAHR  
SLSEEIQRRLATGM  
VYTTAEQRPNAYIPE  
RRVRETQRHISTVKY  
AFYEKMGRMLGSAFP  
PGAKVTIRASLGPLQ  
TKLLKALRVRKKTGG  
ITLMDVTRNSVSLSW  
LVAVLLSRTWHVRRQ  
YLTVTLQRPTKELHG  
AAMFQSERKNPAPQC  
QDHFQVARQNHFPQR  
SPRRRKSRSRSPRRR  
SSEKTQRMSLMRHH  
KHKGTEKRESPAP  
FLDVFLPRVTELALT  
HFFPKSRIVRSLMP  
AVQKTTFRVTRLHEG  
GYTEVQFRPYRTDDF  
DPVEHGQRHTATKRE  
HEYEPYSRLKSDIKD  
TKFQKLHRDMEEATL  
PSAMPQSRSTESAHA  
VWEPLIERVEGKRQW  
PNVDYQFRVCARGDG  
SWIADCARHHCSSTP  
VLESTTGRENDSQHY  
ELSLNKQRKLNKSES  
AWYMHGERAHYSHTM

SATLKNFRYHISLKT  
YIKSELDRELQDRYV  
LGLDEHNRVKVYRFX  
LDTYNVKREAAEQWL  
KAWKKHCRGEGKISK  
VFKHGYERYNAMRAD  
QLSEEQGRNLELQVL  
IKVLEKKRAMFECEV  
GTPVFADRLPEKMKT  
DPSAPQPRAETSGKD  
KSLLDWLRQQADYSL  
KAAQQHWRHELASAQ  
LNKHTALRGEMSGRL  
TCMKFYARVCRSGSG  
PKKVEMQRSLPGSLL  
AKCQVTPRRNVLQKR  
FVELGVTRVGHMNI  
IMEEAVTRKFVHEDS  
EPIQFTKRIQNIVVS  
LVIQKYWRRVLAQRK  
LEAKQKARKKEERQS  
LLEEALLRLLPAELP  
YQTMLKGRCPSVSAP  
LTKEKVSRLDRIVAE  
KELADLARLHPTSCA  
FNELEALRAESVATK  
YLVLQQLRCNGVLEG  
QMVTPPPRLVVGTYD  
VPYFEQCRRDACRCG  
EQEIVQKRTFTKWIN  
KNQGLFHRVLREEIS  
AACCGSCRNVSCLFT  
SLAKFAGRKLKDCGE  
CSSLSPQRLCSKHMP  
DAAAAGDRRPAPDTW  
LDINVVIRQVYHLME  
DDQEIQRLAEQQDL  
RYIRSALRQEKALSA  
LEKAAAQRKAKLDEN  
SGEAPGIRKEMKDVT  
REEAEKQRVASENLR  
VLQKCSHRLQELEKN  
MEFAVNDRPLEPSQA  
AREHSLLRSDRPAYV

SNYQSTTRVKPFICT  
AVASAASRPDSTH MV  
LKYQSLLRMFLSYCI  
NSQVTFPRIQVTSLS  
DALTDPSRKTQKCLQ  
EVLFLSSRSKVFERA  
DTIAHLERTRENMEQ  
AEQSLLRSVASRGE  
TSAEQDNRF SNKQKK  
PANAGNMRYSHSTGK  
MVAVLVSRTVGPTQR  
NHHMEVLRELCEELP  
LVNKDSTRRDSGAYT  
AMVFMDVRMPKFKIY  
LVSHVTLRLLKPECV  
EKFGLEKRQGALELI  
EGCEYEYRVYAENAA  
YACGVEDRKSARLRF  
QPDVTGIRLLSLGAG  
EELHKEIRLIGNESK  
SFLKLTTRAQLGAKS  
LRVIEMEREGKGRIS  
QIYGQKGRTEILLN  
IYNTKSSRERAALSL  
VELLFNTRYAKAIGI  
YGGSYGGRGRGRRTG  
EDTQYQFRVYAVNKI  
NSQPVAVRGGGKQV  
TPSPPPRRRSPSPRR  
LEFDGGSRGKGEHFP  
YLMGGTYRCTYTRKR  
MAVGMGERPEVLHLT  
EGGKGEKRKRETDDE  
ITMWLSKRLPQFLQV  
NIVWKYQRYHFIMAY  
LTASPSSRPVASPGA  
XXXXMAVRQALGRGL  
QAMPYNCRNNLAFPA  
LFGKMIARAGRAGNL  
LIVCFIKRSRGGKYP  
AHEKRKERLQMLQTN  
ASLQPKGRRDPPLLP  
LQRQHLYLRQRHSAVI  
ELKALAQRGIGYHHS

QDEWEIPRQSLRLVR  
AALESLNRAVLAAMD  
QFLEEEGRTLEDVAR  
KDDIKSTRKLKESLI  
YVRVKTERKNFLAVQ  
VNSTHWSRVNKSLLN  
VDTKYQIRIQIQEKL  
AGLSTDNRNVCLWDT  
PRRASPLRTSRSRPH  
MPSKFSCRQLREAGQ  
GENQLLERRRLYHCA  
TTIDDGSRCCFFTKSK  
AAKVFGLRSRKLKLF  
ERLKEPTRQALQQL  
VIFYDFLRGLEASWI  
DEEASYLRFNRNSIWK  
PKNDGGSRIKGYIVE  
LQVITTLRTAAKEME  
SGEGDLRHLGLLGL  
NDQLEEQRQEALQR  
QEGSLSARWPVAGQI  
RQILRLLRLRCTEND  
DPVDSTLRDFCGRCI  
PVYKTSARRGTLSTT  
KTIGSPKRIQSPLNN  
TNSVTAVRIQPLEDI  
LIPVIGPRKNIKKQQ  
ILVNTNLRALINKHT  
WGTATVGRPRGPPKA  
WLEAQEERLKTQLKP  
GETPEACRQARSYLE  
LRQCLAPRLPHSVTC  
ADEIYELRVGTGRTQD  
NAEKYYGRKSPVGRD  
LELESQKRLYEKNLT  
KSEAKLSRKQVDSEH  
SSLSSAGRPGPSEGG  
KVFAKVLREEDSKDA  
FIAKAFKRIKDSEFE  
QHRLESRYSSSSGG  
LAVGKFTRTSGETTH  
VKMCVGSRRMVDVMD  
QRPSGEDRWQEKDQD  
GSKKVTIRSPVQIRN

TSENTLKRVSFLAGF  
QPGTFLLRFSESSRE  
TDFWKTLRYLSLLYP  
AEPGEGTRPATVGD  
PLSPPQHRYSEGERT  
GCFLFISRSKPLKTL  
VFLHQKPRLPKLFKQ  
HSYSVLERFVEECFQ  
TNDLTAKRLLHVKGR  
KSLKAKFRKSDTNEW  
LNELEILRNSAVSQE  
EWKFKLFRVRSFEKT  
KASAAMVRLRLYDIL  
EYNAVKEREFHNQYR  
MVTMGFARDEINDAL  
INIDQFVRKYRAALG  
DISALTLRISELESQ  
SCFKDGVRQPIESI  
PWAKYVVREGDNVNY  
LSFLDAYRNYAQHKR  
SESEDEQRPRTRSAK  
IGSDSQGRATAANNK  
EEPGSSRESVSKAG  
GPIFTTARQLVHALA  
GQSPFQQRKKKIKRE  
DALEEQRRCISELKA  
YKTLHDTRTHFLKTK  
HSSEHAGRNGRNAAD  
AAIGATPRAKGKAKH  
SKRKVLGRRDSDDDH  
INKEAQKRWTRREQA  
SFMSLQLRELVIKSL  
EHKTMASRAKVMADW  
VKQKELSRIEEALQK  
QYSFNSQRFAELLST  
SLHYALARKGGAGGT  
AHTKPLNRRSVLEKN  
SLDAANARLMSALTQ  
SGLDIFERINTSAFE  
AVDSPAGRQQLLQRG  
LVFHSITRSHAENLE  
AEYTVVARNKYGEDS  
NAQILSQRIEKAKCL  
EDKGEPKRRGYLQVN

YGQIESVRFRLIPA  
ENQQCLLREETWLAS  
HQVESFIRKKLESLL  
MKFKQKPREEQLEAD  
ASAADTSRSLWGIQ  
LPKVTLSRDGVPLKA  
ETLGVLARAVGEPMR  
EPRRLSSRRSVLTSP  
SVVWLKDRGEVIRE  
ILTLAWDRVDIAKNH  
VYNENSNRQKLEHVK  
FKIAGDMRATCPAFN  
PSHGLADRVINCREV  
AQQEELERRKRLEQQ  
MEDKIYDRQVTKQSL  
EEQPTSQRDRLSQVL  
TNYVIELRDKTSIRW  
QKSAFTRTVSPGSV  
EVLNEVNRRLKLA  
QTAGVIDRWELLQAQ  
RSKVDDLGRTPMSVG  
REGITTKREQVQITQ  
EASTSALRESCQAEH  
PANGFLVRYLRRKLV  
NNTDEMARLIRVMQ  
ASERKLNRRGSMSYL  
YSASTPVRKPRPGQQ  
EMDISADRVKVEGEL  
WDL SKKL RIP AIS RL  
SLALKNIRCRRGIHK  
ALQAALARVVPSYMQ  
GMYSEPLRQFRDSSV  
MDGAAWDRRNGKLME  
GSYLQFLRILFRMLI  
LKHFIGQREEFETAR  
LVSKDLIRKAGVGSV  
GFKSHLIRLIGNLCY  
AHEDISQRVAAENQD  
EIEEDKARRILELSG  
SMLQHLLRRLVFDVP  
ISPPSPDRPPHSQTS  
RSRGKEQRKLARQRS  
EEAEAAARALARFAQ  
TLTIQKARVTEKAVT

EFTQDLFRFLQLLCE  
GAHKATLRIGQDGIS  
ANLKMELRDALCAII  
ENSLETLRFSISNLS  
MFKWLVARINRALDA  
HKFLTIPRLEELYNT  
RYNERKGRSELIVVE  
SVDVKSVRMGSIQRK  
KGGSKLLRMKLSDFN  
TGTPSDPRRRLRSYE  
PEVFKYNRFLNPDGS  
ESVKASERPLPPGKI  
AYPICEWRYDACASP  
PETIDTARLHYRNSW  
RSALFALRYNILTLM  
EPLKELFRQQEAVRG  
GDEEQKLRFASIID  
YLMLDNKRKEVVHKI  
RLDPVSGRLSTISSL  
KPQDYIPRAPTFMLN  
NSHHECIRKLLQSKC  
TSSLSPQRSKLRIMS  
QGLKIHQRFHFASAL  
SSKPIKIRGPSHCAG  
HANNVTIRESMQNDV  
PGHFVGPRGPHPSQF  
GLDPTQFRVHHYHKD  
PSTNTESRKDVITIS  
IDAIGTKRYDSNSGG  
AESNSNMRCTCRIIE  
VEVAATERTLLGFFL  
YDYVHSVVRGKVAPTT  
SRALSHDRQLISQDA  
GLPNNNAERVLLTTQG  
FDFPDLNRFLTRTLQ  
GGKPVQNRELQGYES  
LSLQVVNREIREENK  
KAFVTLERFDQLYGS  
EAVKYSERSLTKCIG  
FGKKAANRSWQNVYC  
TLRMRSHRVPCGQNT  
QVSETLKRFBAGKVT  
EAVNVCGRATAVVEV  
EKALRSMRKAQVSPQ

EKVLSPLRSPPLIGS  
LDLVSHPRATQTHVE  
LISQINKRYKTKDDI  
SSEKVAERKETEFFS  
TAKPINPRPSLPPNS  
EAKAELERKLSEKDE  
ITKVGEERKGPLPKS  
LVEETEERLVERISF  
QIYSTGLRKGNLHNV  
KHFPNIDREKAMSRP  
SMSKGGKRKDSVWGS  
WADPTGTRKLTWTYA  
AQIADGFRIRVDLAS  
LRDWNLIRDAATLIL  
AEAADNQREEAADNQ  
VYQIKVHRKYTGEDF  
ARLETLVRKAGEQQE  
DASPGDKRLAAYLML  
LSSYATARLMMNNEY  
KLPVDFERSFQEEKP  
GPLPYPERQKRARSM  
DSAKELQRSVEFDRE  
TGTLVSKREVELEKN  
GLFNKNPRHSSSENN  
FNVPDEERCSFATVN  
EREREREREERA  
QQLNKDTRSLGEEP  
FSPLISARFGMGSM  
KTKTDYTRIKSLSIN  
SSPSSGQRSASPSVP  
QHTTMATRSPALPPE  
VQQVTFSRGTDGQPL  
KKKGGLFRRGSLG  
GNFTDAERRKCEEEI  
FLNPDPLRADGISDL  
WFETQEKRLKQQHRI  
QGYIIEKRRHDKPDF  
SLWSNTVRCYLIYTD  
FDFQAMGRIFVGLCQ  
TPGGTISRASRDLLK  
DTDMDSLREARREDM  
KKLRLKFRDVKCIPD  
EPSFEATRSRNRYSV  
SSGKSVARTSLQAED

VMLADSPREESNKRQ  
LSCLTTSRSMTDKLA  
KNYVIDKRESTRKAY  
VWGGIWPRHRFSLQV  
GRREAGSRAHPLLRL  
YIQLEVPREATISYI  
DSVSEATRDQDGVLR  
NQLAEKVRLRLRYEE  
ILKPMMLRRLKDDVE  
VSPFPKKRGRPKRQM  
ATDQEKSRLHELV  
MVLVSLPRIQSORYQ  
XXXXXXXXMRGAMELEP  
FREEEQLRQEREEQQ  
QNLVQDRNLMLPDG  
DEFTTLARDLYAFYP  
DMAAHEERVNEVNQF  
TAEDIQERRQQVLDR  
KMAEESERRAKEADQ  
ALHQKTLRVDVCTTD  
LAAERHARLNDSYRL  
RLDDEIGRKVYMRDR  
IKIQAMWRRYRAKKY  
ESLHQNSRATLLYGK  
QSKALTERLKLNSKR  
PSLEGDLRGPDKLE  
TFYVTKSRDALTETA  
AVSSADPRAPGESPC  
PISDGGSRVIGYHLE  
PHQIGGIRFLYDNLV  
GNMELEKRRQALMEQ  
EEQQESARAVPEKST  
PDLEKVVRYLACGL  
EMEPLVPRVKEVKS  
YNINTYARFCKCCRE  
EKIDLEVRSLETCMY  
LAKMFLNRINYWHLE  
TILDMVERECGTIIE  
KLAYYEIRYQFYKRD  
VPTVTWLRKGQVLST  
DMNKVKLRAIERSPG  
LLDSPYARVHIAEDQ  
GKMPLEERIQKIKEI  
KLKPVELRELLNPVV

LQVVACTRGGMSRLF  
YLQHLCYRNDKVKTD  
DEVEVYSRANEQEP  
EDFSQLLRNFGQWLQ  
LLFRGANRDVRNYNS  
TKSEKLVRLHQEYQR  
GPLASHMRWFIWLMA  
QSVQETVRVRKVDVS  
SLPCLSLRKLPPRSE  
KEVEVAKRNLAQQKI  
LSPGNSARLTPLRYD  
TVGDSSARPARRVLL  
QEEITEYRRQLQART  
MPWKTCWRYLTSGGF  
IVVEEKVRVPEEPRV  
PSFSRQLRDVQETVG  
KKFGGPGRMKQSCVL  
TSLQKLFREVRIMKI  
PPVETIQRTTARDPI  
SQLLTSVRRMVLTLT  
CKLAALVRHRVSLFG  
TLFSNVQRVQGVSER  
EVQYEIFRSLMYWMT  
IELPDLGRFYKIRVW  
AAEELLQRCISSALP  
ELSHDNIRVKWFKND  
VPDALNDRHPDVRKC  
NNAENLFRAFLGELK  
VIAMLGFRLLDAVKS  
KNMLIHGRAMLLVGR  
AQAGAKSRPKKREGV  
DFEYKLDREFLKGCK  
LDALVMDRVAFVKLL  
VSIEAPKREPQPIKE  
PIGYQCSRZYWSTTD  
SANKENFRILVESVK  
HQLTEEDRERLKEEL  
EAAQLSERTAQEVRT  
ECIQMKARLTQELQQ  
AGPGLLPRKPPGLAA  
NFPVHLSRIRRLRAE  
KVDQFVTRFLLRETV  
HYPFENKREFEDAFP  
NNLHSGIRKLEDYLT

RNLWQSSRPLICLLD  
IQSAPNVRFQWFKAG  
ISSPPACRSPSPVAN  
GYPGGKARIIHKESD  
DQRLHTTRSVSMQDE  
APPVTSARFPSWVTF  
DKCNDIIRNKDDTAA  
IEVPISGRPKPTITW  
TEINAKLRNIIVLDS  
VRQEQHKRLEDLRRR  
ITDASALRLVDKAQV  
SILLDFTRGSRGRKN  
FHHCEQCRQYMDFTS  
EYEMPLYRKYWPNHI  
IRPRPPSRRAAQSP  
RAARTLYRIELLRKV  
VGGSGLPRGRRPPRW  
MHHPFLRSMAYWIL  
LCTVATLRETYGEMA  
CAKQEPERNECFLOH  
DDNPNLPRLVRPEVD  
KYLVEIARRHPYFYA  
ELLFFAKRYKAAAFTE  
KASSAKQRLKCASLQ  
FKAWAVARLSQRFPK  
LLECADDRADLAKYI  
MFLYEYARRHPDYSV  
YSVVLLLRLAKTYET  
FQNALLVRYTKKVPQ  
PTLVEVSRNLGKVG  
CKHPEAKRMPCAEDY  
CTESLVNRRPCFSAL  
PIPQCPPRLDVQTIQ  
WNPIEGERYLSFLRF  
QFLEQAQRELAELLD  
LNFTMNDRHTGPAWN  
CDCELQHRVEAIVAF  
FCQEMKFRNKMVEYL  
QEEQAARIIRNTTA  
LVIEEQLRRAAYLNM  
DDIKCLTRDLQASM  
DMKADVTRLPATJAR  
YLHLLTLRGSVLRVE  
MKCSSMQRFGERAFK

GKNIYVERQRPALGE  
SKPEGTPRGPQVYTM  
KLTGMAFRVPTPNVS  
SLGKVGTRCCTKPES  
GPLSLASRNRSQDSG  
LKNVNNMRIFGEAAE  
CQKGFVLRGSGVIHC  
VVVKLLIRRPECFGP  
CAKQEPERNECFLOH  
TCKKFDLRVTIKPAP  
KATLKNLRKQYRNVK  
LVEVMMARRDDLSFC  
TENAIGSRKFLSLGL  
YHKDLQTRATFMEVL  
ANIHKEQRKFCLAAE  
CSGSLVERRPCFSAL  
YDDKAIERLLDRNQD  
EHMPNDSRLKCLLDP  
VLVFEQVRLLMKSYS  
TEILKWLREILICRN  
SFEVDPTRLEPSESL  
NMGQWKIRAFYEHAP  
FSKKCSGRWKTMSAK  
EIMEACMRDIPTCKW  
VNGILVSRGVKDMEL  
TLGSTVGRLQEQLGP  
GLAESGARYTEMPHV  
PLPPLLARVGGNIEV  
TYPGLSKRRLKPEAI  
STLQTIYRLSKGRSL  
YPVGTVRLRYICRPGY  
GGITGNMRQEAI DRF  
EKETDWLRNEMNKDL  
ANQDFTNRINKLKNS  
KYLPGLLRSGFYDLL  
GVVWVPFRGADYSLR  
RIPPVAVRLQMSERN  
LFLHGYQRFWIETEA  
LAFDVGLREHATGYL  
VCALGNSRVASALCS  
ENAQTGGRKRGMSRR  
VSLHLPSRSSPTVFR  
LHKTIVKRRMSHVSG  
YELLKVRPEQLVKH

PMKYSCQRRARLITQ  
VLVNSLHRIITNSAL  
DTTVKKTRRRGQKAE  
EKADMEDREKEDKIK  
SCSRSVSREINLKDY  
WLISKLDRLESSSGI  
PAVNGTLRTSSYEEH  
WVQAVVSRFDEQLPI  
VPLVVFKREKEIARK  
DLSWSMLRGCKEICC  
KGDPPKPRGKMSSYT  
NPDGSPARRVPVVTQ  
IPITSSTRNIRLYPD  
MLQQLRRLVFDVPQ  
IQQLEQRISASGAE  
TSFSNYRTWNVVVH  
EAGGAGTRARSLWRV  
GQPKDTMRLEDEMLV  
DDIAILARYMLMLSF  
FQNAILVRYTQKAPQ  
AHTVVTSRVVNRADT  
GDLYGAERIAELLGL  
QTLWLWARPRAGGAW

### **T-type of carbonylation peptide fragments**

#### **T-type of 121 positive peptide samples**

HLELRNRTPAAVREL  
PRKRPPVTQAAGALP  
LLAKQHKTQRSPVRI  
NEPEAEKTHLFAKQE  
RKSLVMHTPPVLKKI  
GSKRQLQTPKEKAQA  
KDGSVTGKRLRCMP  
DTEEADRTSSKKTCT  
MPRRLTQTGKRKHGA  
GTARRTGTPSDPRRR  
NSKHLNGTITAKYTY  
GKEMLEQTLQKVTEL  
NELLKQKTIELTRAC  
LDTMSKKTALDQLS  
ASKEQGPTPVEKKKK  
DLIQHRRRTQDHKIAK  
IEEELKTTKRKMNLK  
VQKANPGTLAAEIRA  
WIWVQLRTGLARDGR

VSAAQGTTGTAPGAR  
FQASLPLTRIDEEEA  
LNDKHLKTLSTVFS  
RPLKSQITVTRHDKR  
DSKNSKKTNTEFLHT  
ERVEQFLTIARRRGR  
PDDRTARTLTIAKV  
RDLRFVRTAEILAGK  
KDNIPPLTMKRIRER  
KGITFIFTDSEIKDE  
MHFRSLRTKLLMSR  
RQPVTKNTFRQYRVL  
SEVLVQQTQRIRQS  
FVQRRGHTVLKIHP  
KAKKPAATRKSSKNP  
MAVLEALTGVLRSCH  
HSGKLYKTKSNKELH  
VQSIKLITEGASKRI  
YSAEWKSTVSRLGRW  
GAFKAVMTSIKQLSS  
RDKLKFPTPKVVRVP  
VKRGDIFTLEEELPK  
QLIPRHKTREKVD  
NEIVNIRTSLLNLVD  
KQELEVLTANIQDLK  
PKDEDERTVYVELLP  
EKIRLAKTQQASKHI  
EDLGRKRRTMLKIAT  
EVAEKQATDVKPKAA  
EKFKALYTLPRSVDD  
ARIKAKLTQIRRYGE  
SKGELLSTLLTKEKA  
LTKLKAKTDNVVQAK  
QWIRATATALERCSE  
PLGAEKITGELEEMR  
ISNVDVETQSGKTVI  
LPDMSVKTPKISMPD  
RSIRKSSTSSDNFKA  
TPESKKATSCFPRPM  
SVFLRVRTNVGVRVL  
SVSVEKSTSSNRKNQ  
TSPLQSPTKAKPKVE  
SQGKLLRILFGVKR  
STAVGLVTKDPGKKP

LGKKLGSTVGLVAKD  
NYDKILATKKNLDHV  
RAALDKATVLLSMSK  
LLRAGYLTLYGIEAL  
ETKETTTTNKQTSTD  
TPKKPAPTPKEPAP  
RTARAITTRSGQTLS  
KNGKVYFTSDAGIAG  
IALTTYETLRLCLDE  
SSVGWDATEDLRISR  
TEELIRLTQQLRFHK  
NHFLQVETRAGERL  
QTSLIVATLKKMLPI  
DVKSTAFTRSSKEK  
NKEKEMVTSLFCCKLG  
LRIHAHFTGLRYLLY  
TSSPPRKTRRLSPSA  
RLLRIAATPSCHLLH  
PPKRAPSTTLTLRSK  
LRKGIPRTKSVGEDE  
EPARWDTTLPTSPK  
WKKLLEATELKGIKL  
VEKPPKFTEKGNLEV  
LRLLNKHTALRGEMS  
ATRVRNITKKSSHLP  
SYKLKSATGSVVSTR  
ITKKMDKTIPEGRIR  
VARQTLETIRSVGY  
DLKTIYQTCQSTV  
ITKSSTSTIKDKDEL  
VRVTGIPTPVVKFYR  
IMKETRKTVPKIV  
KKLSDISTVVGKEVQ  
SSEPKECTYTIPKLL  
VDVKFKDTVILKAGE  
KILSNNNTSENTLKR  
CLQTLTDTKVFHFD  
KPLKKKPTPVLLPQS  
GISSPLTGKRQDSG  
VLCIIQDTTNSKTVN  
QLSKKLKTVLDQARQ  
LEEIKERTATGLTHI  
KKTILMVTNRRVLCI  
RKIKVSNTLESRLDL

KGFTVKRTLVIHQRT  
LLAPLNDTRVVHAAK  
NETRESETKCLKELPG  
DGTWSPRTPSCGDIC  
RDSARQSTLDKELXX  
AVSEHEATKCQSF RD  
KEGYGYTGAFRCLV  
SSLLEACTFRRPXXX  
LEGNKRITCRNGQWS  
QKLEPLGTELHKN AK  
CLLPKIETMREKVLT  
KVGTRCCTKPESERM  
TPVSEKVTKCCTESL  
EKQIKKQTALVELLK

**T-type of 732 negative peptide samples**

HGSIFSGTAAAPRCEI  
SRNKSGRTALMLACE  
LPAIFEYTVVGEPAP  
SIAFQMPTIAKDGNV  
YDINQIITAVMTHT  
GAAGLEGTAATAAAG  
AREPPGSTAGLPQEP  
KMMHIAATLIQRFR  
CPPGLYQTVPEEHY  
QNIPPSFTKCLKTKMD  
SASAPSSPTGTTVV  
VSPRGMVTRSSPGAG  
DEDDNMSTVMRLRTK  
ARNGISPTNPTKLQI  
RELQARLTLVGKEGP  
NLKFQPPTLGPEPAA  
SHRVGAATAGRLPAS  
PAAASLSTATDGLAA  
PKESMLKTTLTAFGF  
YPEPRVLT LVRITPV  
DSLSPSTIVSGDIP  
RVNKVPVTMTRYRST  
HLRKAAITIQSSYRR  
RLLMASPTRKPEPQV  
QYHKMYRTVKAITGR  
KSKKRNSTQLKSRVK  
KAKEDDKTLSKEPSK  
GGGRNDITGRFTRHL  
ENHPQWDTAIEGDED

DRWNSAFTRKDEIIT  
SEPSDAITCRDDVEA  
PRCAEHGTCRDGKCE  
NGDGGCGTGGRNCSA  
LCKAFVPTCIEQIHV  
DFEVLMKTAHGHLVP  
IVYHRKVTDISKIK  
RSSRKICTIGIAPWG  
VQGDSQGTPTSSQGS  
YIVQKRETSRLAWTN  
DRKILDDTEDTVVSQ  
CRDELVRTTAQYDQA  
QEKSPVNTKSLFKRL  
IEELLSQTTNPDRFS  
ATQPAAPTPTATITS  
SKKDDFFTSFKISCQ  
EWRRANHTPESCPET  
PSAFYQQTLPNSHLT  
MREEAERTRDELERR  
GHMYMILTPSDIQI  
SPQREVLTVPEANSE  
KLESLVLTHLSRCDS  
FSCGADGTMKMRILP  
KPESIKVTTGDTCTL  
VVKYRAGTSVKLRAG  
LKDLLNTMSQEEKA  
SYSSLLETIEVKGAG  
PHGGAMDTHFANMRS  
KFTSITDTPEQVLAK  
AQEERLKTQKPESV  
NPYSLLDTSEPEPPV  
ICESLEKTKQKISHE  
ECGLGHRTVPLLLAE  
SFIDGLATFQISGAR  
SSAMESLTKHLFAIL  
RKLDSLDTKSIRAF  
PEAKCACTDSMGVPR  
PGPPVNVTVKEISKD  
VSPENLHTEEILVCG  
VNIQLKGTNEYVPRF  
PIAAVLATFVTHAYA  
LESHMILTETLFRKI  
RLTYTERTKSTITLD  
LSRKLRETDSQLLKT

GDKRRVFTFPCLSAF  
VLDEDEETKEPLVQV  
SSQEKVATLTSQLSA  
ESVSSLSTNDFSIPW  
CFIKLCITLNEGKSI  
SICSARVTLREPPSF  
KELNALETSSSAMDM  
SSTCEPSTVAAVLSR  
ILKAALITEENQQLS  
NKYHWEHTGLTLREV  
MRTQEDLTQGLLLID  
DKEGRELTLEKPELK  
HQYKCLKETIQKLSNV  
QAEAVLKTQLQELKKL  
LDCVLDLTMKIHNS  
AKGDRAATLEEGNPT  
LKGTQEITGDDRFEL  
LVVFNHLTPPPPDEH  
VSPLLSRTEFCTAPL  
FGQRLETVAYEQKF  
KRLQEEKTQEKIQEE  
PTGPELDTSYKGYMK  
VTPEVKKTSFHVTNL  
NSSNFMNTTNFQSLR  
SASKHSPTETEESAK  
VEGAKKVTVTELLAG  
ENMNRSETEACFFIC  
EVCQKSLTGYLEKKR  
GLSPGSLTSLAPSTH  
GEQLGVVTNWPPSLE  
LIGPCCATANLEAKW  
AELERLRTQLLSHE  
GQTSMPGTLVLCLPQ  
TLQRTGQTILPSLNE  
VNSSVKRTQIKVTHL  
MASFLYSTALPNHAI  
TVAKELQTLHNLRKL  
IARILKDТАIKSADN  
GDGDLMMTSFERMLS  
RIFADGKTWSYTYLE  
DLRKVYGTVLSRHHH  
ALGRDILTKTKQARE  
AMMSVDETLMCSFQI  
XMSLADLTKTNIDEH

AAGGPKLTKRGLAAP  
SPAARISTSPIRSVR  
FKGRPPPTVTWRKDE  
AALECYNTFIGERTV  
MAEILSGTESVPLTQ  
LLAPVALTCGSDGSL  
YEGWRIDTYLDIPLV  
QQMCCVSTSIVSFVR  
YEGGAVCTHARSLWR  
KFHGVLTLCLEVVL  
RMVYCSLTDFQKAVY  
SQRVNGLTSSKNSQP  
CSLRPNQTEEGTTP  
HESQISFTIEGPLTS  
AEAKPKSTCELYSSQ  
SESPVYPTKFDSEKE  
VEKLLDCTVIVDSVF  
TVLKSSATFQSTVAG  
KQKKEEKTQEAYAQ  
GVCSEGTILHRRHS  
LERQNLETFKDRMTE  
IFESVHGTAPDIAGK  
LGPADQKTGTPTPTS  
KLCYDAFTENMAGEN  
KKGASFQTVASLHKE  
KDAYKVNTNLDYKKQ  
VGKPGIPTGPIKFDE  
QKSDDKVTLERLDK  
RDFVGQRTVTFSSLV  
LEISEDCTYADV KAL  
KNCREAFTADGDQVF  
EPLPAKVTERHMQIT  
ALMRSEETADLLAEK  
IDHKEKSTEINHEIP  
STERLKKTNEILKGI  
CEESLSQTPPRVTGT  
GPSSERATPAFHPVC  
GPKQASFTDVRDPSL  
KIQQLVNTLKRPKRP  
ICELSFETE HILLQH  
KKALLPPTVSL SATS  
LHNFSIYTLLGKQVT  
KDLVNRYTQNGSLDF  
KGEDPLATDTRVSVE

LKANQVATGIRYNER  
LQSHFIPTIGRLRKR  
AFMDISATDLVLRKV  
AFLRHKMTLISPIIL  
YLRNLPITAHPEVFG  
LWEGKPRTYITEERA  
IRILCCLTFLVKVKS  
GYGSNKKTkhmlpsg  
EPALVPGTPKAEDRM  
GYHVINNTFQSLLGC  
XXXXMWPTRRLVTIK  
RFRHLKKSKEAVGV  
KLAQLIATCPPSKSS  
LKDSDEITEDDNIRM  
GGEVIEDTYGAGGGE  
PKAAKEKTVKKETKV  
PPEVLDVTKSSVLSL  
HPSVMMTAGRCHTL  
AVPAAISTSEAAPYA  
VDRHREKTLRLLWKI  
SLKSLILTALQRETE  
RVDALERTLEQKNKE  
AGGSLKVTLQSSDS  
TLTAYIVTSLLGYRK  
GKPV DGLTTLRNGTL  
TKQSFSLTMSIEMPY  
LVSKELSTWKERPAR  
GEAGGGSTAAEEASE  
IACDNIGTPLAVFSG  
RPCDEDKTDSETGKL  
RTSAPSPTALKLATV  
RGQPRTRTRASVRGF  
VENMILLTIQYLVRL  
VMADDEFTQDLFRFL  
NVSQDLDTIRSNINN  
SRSKADYTSHLRSLV  
KSRHSDGTEKNKLPS  
SVPKVEGTLKGPEVD  
KEEVPEPTPEPPKKQ  
ADGLQGETQLLVSrk  
NKVQLMVTDSLSNQ  
ILYGPPGTGKTLLAK  
CIEVVFVTKFLYSIL  
EQSIWNVTVLPNSKW

GLNMCAPTDQDLITL  
SLIKQIATKVHPPGGT  
HGREAKVTETARVPA  
TDGSEIKTDEHYTVE  
SFIWELITPTKDGQA  
AAMRAFKTVTTKCSK  
SDKFYKQTVNLQLQP  
EIVFCAVTSNEQVKG  
PPHLKPATEKLIVVN  
EVKGAGMTEHYVTQL  
CLKEIDSTLYKNLFV  
SPNPDVWTSEQNPPY  
EWPFLIITDLFLKSP  
YEAQKRITQVFELEI  
KAVVNEDTQGNVSQL  
GFTFGTATLASGGTG  
PSEAIEITAPEGSFA  
AESGIRYQMPHVME  
DALCLVLTLMNGGDL  
KSLQAVITNLTQGEE  
LQPEPINTPTHTKQQ  
GTLVSHVTLRLLKPE  
VNVRRDSTGMPLWLV  
MFDERIFTGNKFTKD  
KVLKWNFTTPRDEYI  
DITENAATVSWTLPK  
SSIQEQTKANEEFQ  
GSMLVSWTPPLDNGG  
FLPLFKATINPDHR  
PRAEKEDTAELGVHL  
CLSVLSSTSLRLHSN  
QSLQLSTCDVESKR  
HSADVHTFRQLDRL  
HQQALPGTHIPEEAQ  
SAPYLLATSCSDEKV  
GLVVKAGTTVRFPAI  
ALYSRIGTA EVEKPA  
IALSSSETTKHATNT  
NRLVDYITKTSCHLA  
AEAQPEATAKNLLHS  
FFLYSKLTVDKSRWQ  
CVSSIFWTQEVSQAL  
ALQPSVLTMCNGGAG  
YKDSRGLTPLYHSAL

EPKECTYTIPKLLEG  
EALIKKLTQDNLAL  
AIQIASATMPALSLN  
QKEVEQQTGLSVFLP  
LEEKAAMTDAMVPRS  
NVIRSIQTDKREKYY  
AGGHPLDTPHLPQEL  
KVQIHHNTWLHFPGH  
KAEPLAFTFSHDYKG  
KLYIEAPTFDLQGSY  
DCNKAAVTIQSKYRA  
TILEPLFTESESKIF  
RHLKESQTESTNAIL  
GDGFYLPTAGAPGSL  
LSLSVELTEAKLHHG  
PSQFPSETAFLEEF  
RVASNPYTWFTMEAL  
PSPFDCSTDQEEKIE  
TSESSIHTITPSVVN  
AELENIATLCFKALE  
EQVAWALTKFPCLQL  
KNYSLKYTKYTKKDT  
QHPAASPTHPSAIRG  
QNAQVCQTNPEPPAT  
IPVNEKDTLTYFIYS  
XXXMAAATVGRDTLP  
IILGNPATELSVATH  
KDNSRDETFHFQCDC  
YLDGNEITAIQKHGI  
LFGDVGDTGERLLYN  
KKAEAVATVVAAVDQ  
NLELRNLTVELEQKI  
VEDNKRFTRIPLVQL  
EALHELRTAEFEKTE  
QDLRVLPTIDLSTMP  
LADDLKKTVTIRAGA  
AVNNYHKTNPSTGTQE  
INKFAEYTHEKWAFD  
TIRGDLETSNLQDMQ  
GEGECEQTPEEPEPV  
LREAGSVTALVQCVL  
VARREQNTKRDIPDK  
ELHICFETTKSNEAM  
LGHDEDNTRISSAGC

VVRDAVITSNGTLPD  
QMLDDSTQLNSDLK  
VKSVNSGTWIASNSE  
RGMINVSTSSDMDHN  
VRRQEDGTQPQVNGQ  
LHPRAVSTSTFGCRVN  
NIAVILLTDLIIDHS  
DYLRWVQTLSEQVQE  
CHALSGSTAELREDL  
ESWLVPATLPGPGES  
HFHIRCFTCQVCGCG  
QIQFSQCTDRIKDLE  
NKPVSFLTAQQLQQL  
WGWRIERTREGDSMA  
PPPAPRPTSRYNSSS  
WSWSEQNTNEQQPDV  
NLGKKPGTITTVGLL  
LEVIYGDTSIMINT  
ARLMSALTQLKERY  
TINIICTVDYLLRL  
QKREAEETAQKMAQL  
PEKAKSPTKEEAKSP  
DYESYEKTTTRTSDVG  
SGNIKNWTSLMAAVA  
PPARLAKTPSSSSSQ  
VDSSQKPTPSAREDP  
MLCEEFVTSYKALKS  
LVLEIEGTVNSTTYI  
SQLKSDLTSRDDLIS  
QTKVVPQTVMATVPV  
EDSGGGGTGVKKKRK  
DQIIPRMTTQSPLNQ  
KEIDNDFTNETKISP  
AENGKEGTAKGAPG  
PRPLPRSTFARPAFN  
YLLVLATDLGSPQ  
XXXMFKNTFQSGFLS  
EERCSFATVNIQLKG  
TPLGPGSTSSLERRK  
PSSLKGSTSLLVHPV  
GYPNRDSTKYAEIYG  
KVDQHEWTKCNTTPT  
SNQPASVTDYQNVSF  
KFPGPSHTESYSWPP

PYLSEVLTFCLEVAR  
CQDGSNLTASQRAYA  
KNLRSISTSNQPRKK  
KDVNERNTVKGFRKF  
NCQDKLETSLHVLNQ  
RSAELGCTVDEVESL  
HMHQNVPTTEEQR TNK  
KKQSKKGTEEKKKPS  
MPDPVDPTTVTKTFK  
IASNSELTPSESLAT  
RLQMFNVTPHHHQHS  
RPDIKKATQAAKQAS  
SKKLLKATGASKKSV  
APKKPTSTKKPKTMP  
ELKHHHV TLEASQKE  
GWLLEEQRKKQKPL  
EVIYDAKTVNAVVEF  
SECGKGFTMKRYLIA  
IRLPRKATKTKKNYK  
TPVPRVRTDYVVRPS  
PVGKLTQTSGKTTQT  
QARPGEGTAPLPPPG  
TPLQPQATTLPAQTL  
KHVSRQDTLQQCQAW  
QNEFLGCTDRLVITP  
SLTQAAFTPIPVDTS  
KDPRQQSTPQAANSP  
KREKEQVTEPAAKVP  
EKNQALNTDNYGHDL  
PESIPLGTEDRISAS  
QHKAVLLTGEQG TAK  
DWVDGEPTEAEKDFW  
IWIFAHVTQGQDPWI  
YLCNAQITMLQMLAL  
KTDMLMITRRGVLFV  
EELGSAGTSARCPPQ  
LEARLWETEKICQLE  
TDSRTSLTIENANRN  
GPSGSGKTTVITILM  
IREIQKVTKLDRDPA  
DSLEEKYTEPVILNL  
LWAALLVTFLAGCQA  
FYYYWKKTP EAASSR  
PYRDSKMTRILQDSL

VGEISVNTSVAFLPY  
VVVGEIVTEEHLRRA  
EFRIDSVTGAITVAK  
RGASFGSTSVSGSEP  
TTNKQTSTDGKEKTT  
VEHLEDQTVTEFDDA  
EGSDIESTEPQKQCS  
QAPPPQPTQPLQPKA  
SKSSQIGTGDLKILT  
NSQLARHTSPSVISD  
DRSQGGETLDECGLK  
YYGLSGMTKNTFEVF  
ENAEDDKTENQIPQR  
XXMEDSSTDTEKEEE  
SEAINELTVLVLVNT  
MSLYASLTSEKVQSL  
KAFCRMVTRKLETQK  
QGEVEEQTFKEKELD  
LDDNKLLTLPNGERL  
EGYYEAITAVELKSR  
SLHQEFSTKQKLLQN  
VRDPVRDTPGTCHVT  
KVEHVKVTVLDVPGP  
KESDAMSTQDQHVLV  
DSSNCSITREHICVH  
NLVNKDSTRRDSGAY  
TVKVTEATITGLIQG  
TIVPHGYTEVANIPV  
KTADHFWTDPSADEL  
ALGEKPITFYRQALL  
NSSNKSITLNGTKTW  
DVSGILATQVYTWVD  
NLDLDNETFHIIYQPQ  
IKRKQQDTPGSPDHR  
RHRINPETDLPRKLS  
GKDQEERTKAIEAFR  
ELYEHWKTLMNRQDQ  
VKGAAGRDLRLRR  
LVDIQGLTFQVICSY  
FNYLKDATEVKVIE  
DVSRDGMTLTWYPPE  
PNLSCKRTLSFQLLL  
AVKGAPETLHSMFSQ  
PSGADSKTVKLSKSPV

RILRDVHTALSTPGS  
PPALQAPTGVTPAPS  
AIDGGKNTSGLPAEP  
LDPECKCTDDRLWEA  
SHREKPGTFYQQELP  
IKRQVVETMGLFHDM  
HPPLQPLTGSAGQPS  
MHFESFITEKKQNIQ  
PHIKPPPTTPIPQLP  
ELAWHVKTITITEME  
GNPRVLDTSRSSISI  
DNEGISSTVITFMTS  
KVEQAVETEPEPELR  
RSQKSLWTIKSMSSED  
KKLKHRRTSETSISP  
LSPVLPFTPAAMTQA  
SSIYKEDTVLHLCLR  
QEIVQKRTFTKWINS  
TPPQPSLTASPSSRP  
LEDEGEYTCMASNDY  
FVIDGKKTCKLKMK  
SALAEGSTYVPYRDS  
DGSRCFFTKSKTDYN  
AAETARRTREFRSPP  
KSLQWGITSPLLRC  
PPFSPHPTLLSSTPK  
TFDIEAVTLGTTSNN  
AEEFNDETNRGRFL  
FHAVAWGTPGFLTVM  
VYLGRDKTMQLLEEL  
ENLNKLMTNLKSTAP  
PFQMDPETGLITVRE  
QREIERNTCKIKLFC  
TCIHGVWTQLPQCVA  
YLDFSVSTGMLAGV  
IPEPSNITGNSITLT  
NGVSVEDTINLLASL  
TSSAQKITKSVKAPT  
GSQFFITTKPAPHL  
PTDEVPSTPLALEPS  
SEADSSETS VSEKEN  
ERICELTYQAEEDK  
IYGKPIPTIQWIKGD  
YDGGSPVTGYWLEMK

SYSENIATLQFSRVE  
HSKKVLNTGHPLVTS  
VRPARRRTPSPDYDF  
INIEHALTFLRNRSI  
AVSSFKKTSEMEASS  
SGSQMGSTLSLAERP  
DGERDPFTCPGFASQ  
HGNNQDLTRNSSTPG  
YYALGQATGLDEEKR  
NIVHLSKTHFPIVQN  
LRRIANVTLIDLRGC  
EYQCSSSTPSLNLTN  
VAGQIRATQQHDFT  
SSVHAQSTLESVISQ  
ESVSSPPTLHMKTGL  
ESCGSNSTNRSTAES  
NEKVEEFTTFVKALA  
VKWFKNGTEILKSKK  
LACKVTGTPIKITW  
YWVMAFITKTIKLVK  
KKISAAQTRLSELHD  
ILRQLRQTVEATNSM  
LIRSASVTPKINQLC  
PSVICEHTKQFQTIS  
NKQQNFNTGIKDFDF  
PYPSEASTTFPESHL  
DMAPLDHTSDKSLLD  
QKIERVSTKVIRTLK  
GHPAPPVTSARFPSW  
ILNSLGLTISVSPSD  
GAEIEIRTYDLKANA  
RCAAASATVSVQVTD  
VLGQLGITKVFSNGA  
VSMHKFLTIPRLEEL  
LELYLVKTSDSGTYT  
KKDGFNITTSEKCNI  
VPPSSHETGFIQYLD  
ASDKYRMTFIDSVAV  
VDPSKFMTPIAHSQ  
GSAEGGPELTPATS  
VQGNPGKTKKGELSI  
EIEERARTEIISTDN  
QLRDVQETVGLPVVF  
VPHILRSTLPATALP

DLDIQVTVDPSPST  
VDASFMQTLWNMNPI  
FPLPDEKTKKRIFI  
ENALQLGTPVLIENI  
LLAILLKTTNRASDV  
INNVRMTSHPTLPY  
EKNFSFLTKGANQHN  
KQSQEEETHRLEIEE  
PAAIAAATTTLAQEE  
LEGKMKGTKVKTPEM  
ARYSIENTDSSSLT  
GWGSPQATAMVLNNL  
FGGLDVLTIISLGGIP  
EEGLRAWTEGEKQQV  
KAEKSSSTDQKDSKP  
YSLWEHSTKNHLQLE  
THEASKLTNHVELFK  
SLFVRDATRDHRGVY  
XXXXXXMTTQAPTFT  
DAYLVLHTAKTSRGF  
YQVGKEFTSKMDLEK  
KKEQCSSTQSKSNKT  
QINKRYKTKDDIKST  
REKVASDTEEADRTS  
LGHLAKFTCEIQSAP  
HVVFGESETGEGENND  
TAITVSDTVAVKETS  
ITLPVASTASTSLVV  
ELNRKIATQEVLRH  
YQLSKEYTLDVYRLS  
SLGGNAKTAIIANVH  
MIKVRQYTVKEIREG  
EFVSHPSTTCREQMY  
DSGEKRVTITEKSVA  
SFLSSNSTFCNKQNV  
DCKKLIDTFGIRWPE  
PNRTGARTLADIKAK  
VQQVHEETANTIQRK  
KVAERKETEFFSSLP  
WAVDRCYTGSGRVAA  
KKQKSIFTSVPDTPD  
EARN DAGTASCSIEL  
EMKKS VHTQVNTNTT  
QELYLFDTTGKHLTY

DQLNEQVTKLQQQLK  
ARLREVQTGWEDLRA  
TIKAIKDTEAQKVST  
NFKKENETLKSDLNN  
DVNVIEGTKAVLECK  
SCPSEPNTAALQAAL  
VLPRVRFTRHGKELK  
AASRPDSTHMVEARQ  
KSDVPPLTTKGKKAT  
AAQLKPMTPFKRTRI  
KINREKATFKHPRTT  
HCISLKDTNKRVESS  
SPSADIGTTTEGDSI  
PSRKSVLTDPAKLKK  
FSVSICQTLMQDQQT  
AEELSYKTAHEDISQ  
LFVIDPNTGVITTQG  
LDLGSLNTSSHRTVP  
WVNEKMKTATDEAYK  
ISVSPLATSALNPTF  
LSVSVVQTPTTFQET  
CSELSGNTKSRESIQ  
VIFYRDKTEELMELT  
SCGKKEYTIVVKVLD  
IDQFLIATFMQLRLI  
QQQAFPVTEIDCAQD  
VKGVDVTLPRVEGK  
NSSPDEDTEVKTLKL  
MATFECETSEPFVKV  
FYLNMKMTFEEPPFE  
KIPSRFSTPEFTILN  
LYHSEAFTVNFGDTE  
AGCPVGQTRTNTFEQ  
VYWDYAMTIRLEEIV  
PLKRLNLTWTRNRYPD  
SCQRPNTGRLNGES  
LILEGTFTGTPPISV  
LQPTAGGTSKNEGTI  
EAISLSETVKKVEYD  
RRGRKPKTVLNGILS  
RNPEGSRTLSPSRGK  
VHERDVNTDFLLILL  
KQRKDKDTLKAEKKK  
ELPLIFITPLSDVKV

PKPAVAHTAEREQVI  
SSGNCLHTDGNETNV  
PPDRFKFTSVTDSLE  
GTTVVKVTPDLKPE  
GIGPPVETIQRTTAR  
RMYLSCLTTSRSMTD  
RARHRCQTPHLLAAX  
IEYLMGGTYRCTYTR  
QPRPPPSTQAPSVNG  
MIKLRGTKGLVRLF  
AGKASCTTHLYIKAP  
SMALYNRTRRISQTS  
DIKWVDDTHALGVFS  
VLSNVEVTLNVLADS  
RVFKIKSTVVVKDLV  
RELEIARTNQEHAAL  
EDISPVQTDALDSVR  
LCLEPPNTHRVSSFL  
XXXXMVLTGESPVP  
SLGVILYTLVSGSLP  
VVVISGDTGCGKTTR  
RVCSKRGTTESKEVL  
DSEDESETIPTDKTV  
YGADHPYTARELEAL  
TSLHCALTEGLEILS  
LGGNSYVTWNYAWSK  
PRVRKPKTTPTRKM  
QYHRGEMTALREELK  
NMVQRPSTVDFIDWV  
NIEECSLTQQNKSTV  
ILEILESTIEDYAQY  
SEDDNFGTAQSNKAI  
HQNVVAETLSALENK  
ESDSGDYTCIATNMA  
WKYYCLPTGWANFGV  
EYDPSKATFVKVVP  
IYRGEELTYDYKFPI  
PGEKRKMTDSHVLEE  
ARAYPELTLAIFSEI  
KCIDPGKTLPEALDY  
KQLLEYQTMLKGRCP  
RLHQLHITGKLPAGS  
GDLPEAGTTRTFSVV  
LNPAVLSTASLGSSQ

MTAFADRTVVVIAHR  
DDQELQITDRIKIQK  
ILGAKEGTQEFVHTE  
DGEWVYNTFCIYKRC  
AGAPPCTAVTSDHL  
ELPRHPPTFDNLYEY  
QNYHLECTETQAWMR  
PAIFGVLTKEQLLF  
RGISKHSTSGTDEGE  
LLHQGLSTSHFAWAF  
KVDMKDVTKINREKA  
AVQLNIFTAVLSALK  
DTTKVSFTYDETAGM  
KAVLQRKTACQDTDE  
TVQSKILTTGENYKT  
RRNCCYKTNSHGETV  
PDCNFRVTDVIEGTE  
RRGRAGATSGELPVV  
GKQPFLGTLQDNLIE  
KDAASFLTRMKEKHG  
CGNFDLKTINEMRTP  
KPDDKAKTLSYEPLS  
SYWSIFMTLLHFVAS  
GDGPRSETKEFTTPE  
SRESKMQTRILKQDL  
CYIQHVDTGLWLTYQ  
YIEKRETSRLAWAL  
VSEPELATLSGDMAQ  
AYDPEDETILEEAKV  
SSKRRPRTRAQKVEV  
SPDPSSTPTSPVVS  
LNESTFDTQITKKMG  
EVRKSALTLMGPLD  
VYYSRSKTTHIATN  
YVIVPLKTGLQEVEV  
VGIDLGSTGDTTEAL  
ALAVVDVTKRHVDLK  
ERKQERETFSSAEGT  
APKAPEVTTVTKDSM  
HYLHLRATVVSQRR  
TKDKKIITNHQKKNL  
SDLDSNQTHSSGTVT  
PFKAAPHTIHPPCVV  
EGNDIRKTNVAQIRM

SPFSSPETSFRFGHHI  
IQRAAEESTEEVSSLR  
ANGEIAYTIAEGNTG  
YRKHYEDTKANVHIP  
GMMSDYGTARRTGTP  
MAHMFVSTNLGESFM  
QKICGKKTAFDPSVD  
GQDYEHVTMLRDKFR  
RMEIKDQTKCAASVG  
EISSASRTCTFLPPF  
RDGQVISTSTLPGVQ  
KRFDYTTMHRIKL  
DLKSLPDTELMKDTA  
EQNMIGMTPTVIAVH  
PKDPVIETIRNYFPE  
QSLPASQTHMRVTAS  
AVALVFLTGCQAWEF  
DTDENVGTPCPVSAF  
HSNMQFSTFDRDADQ  
GFSWIEVTILKPHLQ  
KLKPDNTLCDEFKA  
HHLGKEFTPSAQAAF  
YILIGSSTSYCEIQG  
LGANGRHTSSWLVTP  
GRIGRLVTRAAFNSG  
DSRFGSLTSNFKEFG  
PENLPPLTADFAEDK  
LKSNSMVTLGCLVKG  
FPESWLWTIEELKEP  
EPKNLVKTNCELYEK  
KAQEAGYTNATTTDQ  
GREEEFFTYRSSVTY  
SMILDICTRYLGDVD  
VKDSCVGTLVVKGDP  
YRLVGEATISCWYSQ  
YVVLARLTAQPAPSP  
DEANQDFTNRINKLK  
QDIWDDTKQTVRVL  
CQNDIMLTATCKSDG  
LAKKYEATLEKCCAE  
NLLDNWDTLGSTVGR  
SLKYNFVTPLTHMVV  
DPPACYGTVLAEFQP
